# Supplementary material for: Secretory factors from OP9 stromal cells delay differentiation and increase the expansion potential of adult erythroid cells in vitro
Source: PubMed Central journal article supplement (PMC5792592; doi:10.1038/s41598-018-20491-1), 2018-01-31
Supplement: 41598_2018_20491_MOESM1_ESM.pdf [file 41598_2018_20491_MOESM1_ESM.pdf]

**Secretory factors from OP9 stromal cells delay differentiation and increase the expansion potential of adult erythroid cells *in vitro***

Kongtana Trakarnsanga<sup>1,2</sup>, Marieangela C. Wilson<sup>2</sup>, Kate J. Heesom<sup>2</sup>, Tatyana N. Andrienko<sup>2</sup>, Chatchawan Srisawat<sup>1</sup> and Jan Frayne<sup>2\*</sup>.

<sup>1</sup>Department of Biochemistry, Faculty of Medicine Siriraj Hospital, Mahidol University, Bangkok, Thailand; <sup>2</sup>School of Biochemistry, Faculty of Biomedical Sciences, University of Bristol, United Kingdom.

\* Corresponding author: [Jan.Frayne@bristol.ac.uk](mailto:Jan.Frayne@bristol.ac.uk)

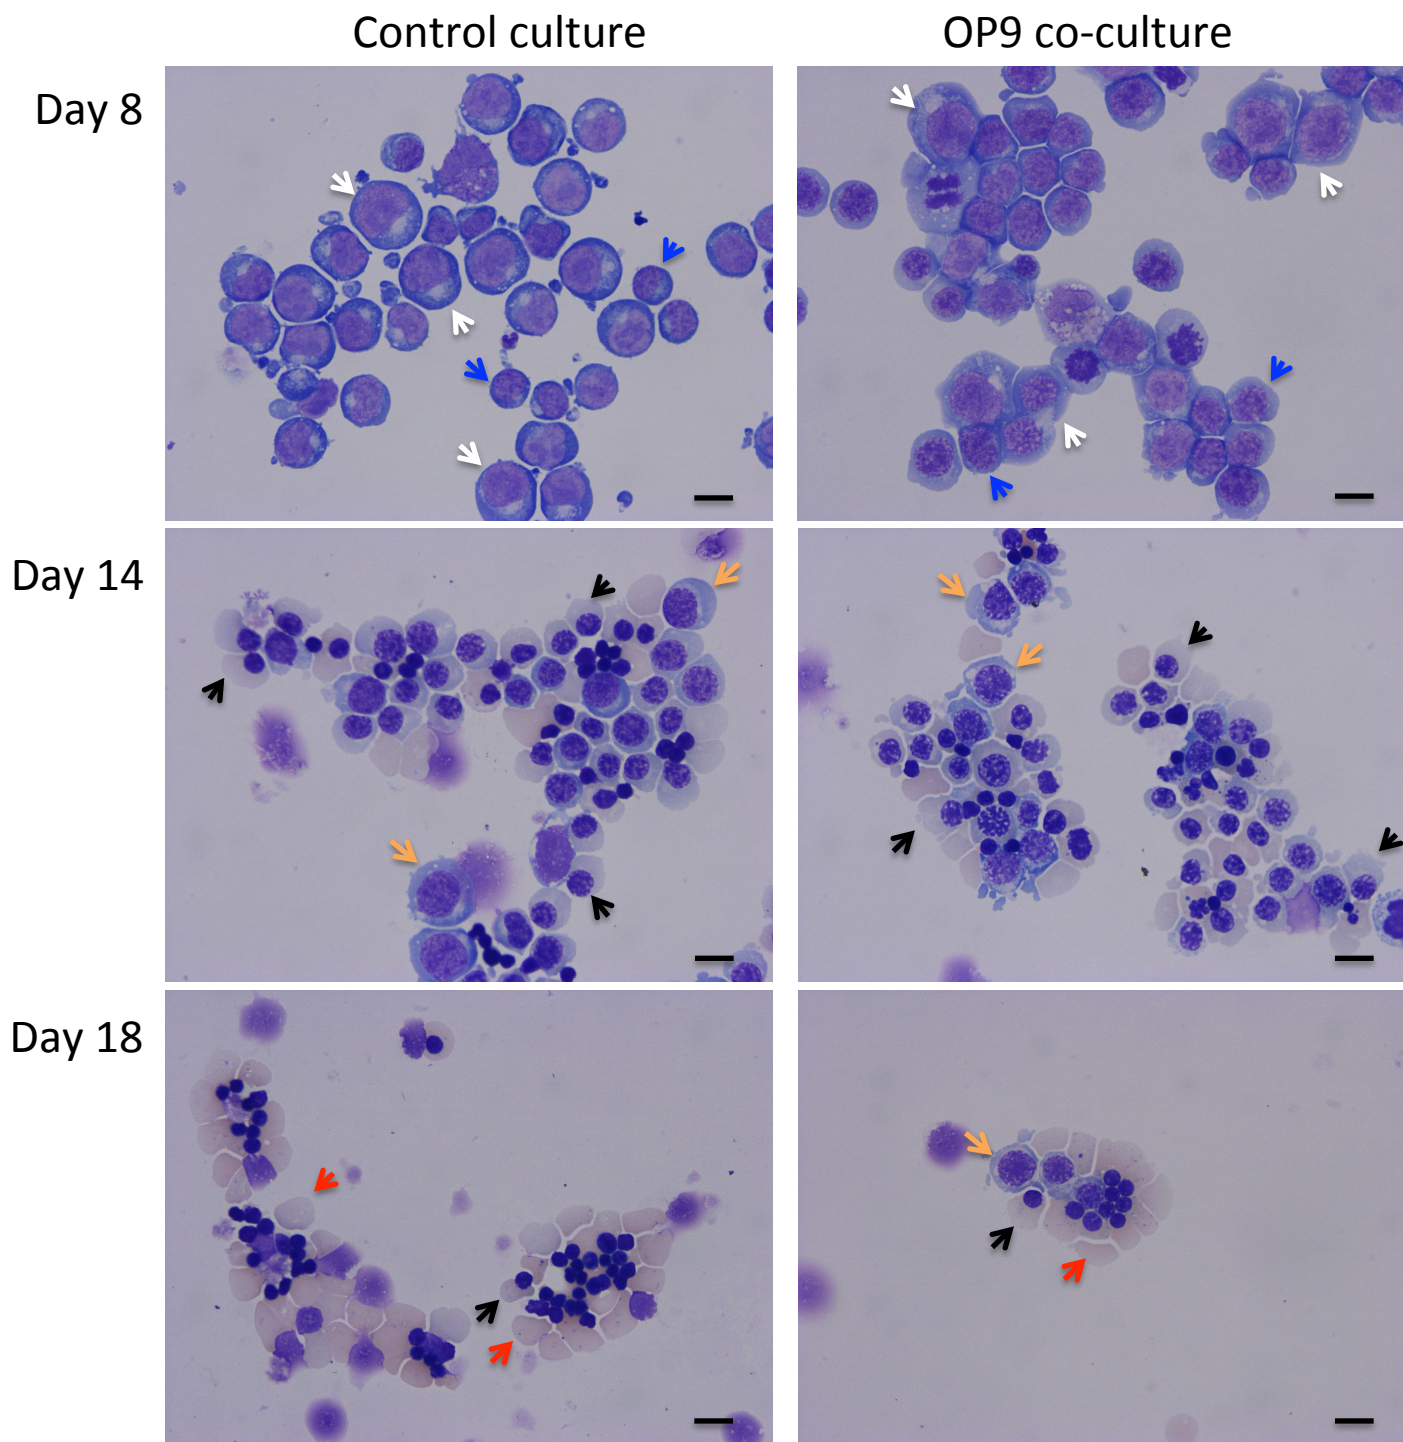

**Supplementary Figure 1 OP9 co-culture delays differentiation of erythroid cells.** CD34<sup>+</sup> cells were cultured with and without OP9 stromal cell in erythroid differentiation culture. Erythroid cells from OP9 co-culture and liquid culture at day 8, 14 and 18 stained with Leishman reagent and analyzed by light microscopy (scale bars = 10  $\mu$ m). white arrows = proerythroblast, blue arrows = basophilic erythroblasts, orange arrows = polychromatic erythroblasts, black arrows = orthochromatic erythroblast, red arrows = reticulocytes.

**Supplementary Table 1** Morphological analysis of day 20 erythroid cells cultured with and without OP9 cells (mean  $\pm$  SD, n=3, student's t-test).

|                | Liquid culture   | OP9 co-culture   | p value      |
|----------------|------------------|------------------|--------------|
| Polychromatic  | 0%               | 7.1% $\pm$ 1.7%  | 0.0021866491 |
| Orthochromatic | 8.6% $\pm$ 1.7%  | 57.2% $\pm$ 1.6% | 0.0000035131 |
| Reticulocyte   | 91.4% $\pm$ 1.7% | 35.7% $\pm$ 1.0% | 0.0000011105 |

**Supplementary Table 2** Morphological analysis of day 20 erythroid cells from OP9 co-culture with and without direct contact (mean  $\pm$  SD, n=3, student's t-test).

|                | Direct contact   | No contact       | p value     |
|----------------|------------------|------------------|-------------|
| Polychromatic  | 4.8% $\pm$ 0.6%  | 4.5% $\pm$ 0.9%  | 0.588142079 |
| Orthochromatic | 53.3% $\pm$ 3.3% | 55.3% $\pm$ 3.5% | 0.524483989 |
| Reticulocyte   | 41.8% $\pm$ 2.9% | 40.3% $\pm$ 3.1% | 0.553709721 |

**Supplementary Table 3. Details of proteins identified by MS in OP9-conditioned and control media.** Analysis was performed against the UniProt Mouse (3A), Human (3B) and Bovine (3C) database.

# Supplementary Table 3A

| Accession  | Description                                                                                                    | Coverage | Unique Peptides | Peptides | PSMs | P OP9/Ctrl   | S OP9/Ctrl    | T OP9/Ctrl   |
|------------|----------------------------------------------------------------------------------------------------------------|----------|-----------------|----------|------|--------------|---------------|--------------|
| P62259     | 14-3-3 protein epsilon OS=Mus musculus GN=Ywhae PE=1 SV=1 - [1433E_MOUSE]                                      | 16.08    | 2               | 4        | 4    | 1.683        | <b>3.202</b>  | <b>2.171</b> |
| P61982     | 14-3-3 protein gamma OS=Mus musculus GN=Ywhag PE=1 SV=2 - [1433G_MOUSE]                                        | 18.22    | 3               | 5        | 5    | <b>3.372</b> | <b>3.440</b>  | <b>5.582</b> |
| Q5MPX5     | Activated leukocyte cell adhesion molecule soluble isoform OS=Mus musculus GN=Alcam PE=1 SV=1 - [Q5MPX5_MOUSE] | 18.80    | 2               | 2        | 2    | 0.794        | 1.835         | 1.103        |
| Q60994     | Adiponectin OS=Mus musculus GN=Adipoq PE=1 SV=2 - [ADIPO_MOUSE]                                                | 24.70    | 5               | 5        | 8    | <b>2.756</b> | <b>16.040</b> | <b>3.943</b> |
| Q61282     | Aggrecan core protein OS=Mus musculus GN=Acan PE=1 SV=2 - [PGCA_MOUSE]                                         | 1.45     | 3               | 3        | 3    | 0.883        | 1.758         | 1.036        |
| Q6GQT1     | Alpha-2-macroglobulin-P OS=Mus musculus GN=A2m PE=2 SV=2 - [A2MG_MOUSE]                                        | 3.12     | 4               | 4        | 7    | <b>0.498</b> | 1.368         | 1.385        |
| P97449     | Aminopeptidase N OS=Mus musculus GN=Anpep PE=1 SV=4 - [AMPN_MOUSE]                                             | 4.45     | 5               | 5        | 5    | 0.716        | <b>2.597</b>  | 1.255        |
| Q99KE6     | Amy1 protein (Fragment) OS=Mus musculus GN=Amy1 PE=2 SV=1 - [Q99KE6_MOUSE]                                     | 8.67     | 2               | 2        | 3    | 1.727        | <b>4.522</b>  | <b>2.346</b> |
| P11859     | Angiotensinogen OS=Mus musculus GN=Agt PE=1 SV=1 - [ANGT_MOUSE]                                                | 16.56    | 5               | 5        | 6    | <b>9.024</b> | <b>20.481</b> | <b>9.918</b> |
| A0A097PUD0 | Anti-dectin-1 15E2 light chain OS=Mus musculus PE=2 SV=1 - [A0A097PUD0_MOUSE]                                  | 36.17    | 5               | 5        | 14   | <b>0.420</b> | 1.169         | <b>2.885</b> |
| A0A097PUG1 | Anti-lox-1 15C4 heavy chain OS=Mus musculus PE=2 SV=1 - [A0A097PUG1_MOUSE]                                     | 21.37    | 7               | 7        | 13   | <b>0.430</b> | 1.211         | <b>2.284</b> |
| P32261     | Antithrombin-III OS=Mus musculus GN=Serpinc1 PE=1 SV=1 - [ANT3_MOUSE]                                          | 28.39    | 12              | 12       | 41   | 0.612        | 1.843         | 1.150        |
| P05201     | Aspartate aminotransferase, cytoplasmic OS=Mus musculus GN=Got1 PE=1 SV=3 - [AATC_MOUSE]                       | 5.08     | 2               | 2        | 2    | 0.808        | <b>3.594</b>  | 1.409        |
| B9EIU3     | Attractin OS=Mus musculus GN=Atrn PE=2 SV=1 - [B9EIU3_MOUSE]                                                   | 9.59     | 12              | 12       | 23   | 0.792        | <b>2.203</b>  | 1.207        |
| Q8CIF4     | Biotinidase OS=Mus musculus GN=Btd PE=1 SV=2 - [BTD_MOUSE]                                                     | 4.62     | 2               | 2        | 3    | 0.861        | 2.278         | 1.592        |
| Q8R016     | Bleomycin hydrolase OS=Mus musculus GN=Blmh PE=1 SV=1 - [BLMH_MOUSE]                                           | 7.91     | 3               | 3        | 4    | 0.691        | <b>2.159</b>  | 1.252        |
| Q8VDK4     | Cadherin 13 OS=Mus musculus GN=Cdh13 PE=2 SV=1 - [Q8VDK4_MOUSE]                                                | 10.92    | 5               | 5        | 5    | 1.199        | <b>2.063</b>  | 0.947        |
| P62204     | Calmodulin OS=Mus musculus GN=Calm1 PE=1 SV=2 - [CALM_MOUSE]                                                   | 18.79    | 3               | 3        | 3    | 1.714        | <b>2.567</b>  | 1.761        |
| G3UWV3     | Calumenin OS=Mus musculus GN=Calu PE=1 SV=1 - [G3UWV3_MOUSE]                                                   | 27.27    | 3               | 3        | 3    | 1.621        | <b>17.907</b> | <b>9.115</b> |
| P16015     | Carbonic anhydrase 3 OS=Mus musculus GN=Ca3 PE=1 SV=3 - [CAH3_MOUSE]                                           | 6.92     | 2               | 2        | 2    | <b>2.058</b> | <b>6.284</b>  | <b>3.168</b> |
| Q9WVJ3     | Carboxypeptidase Q OS=Mus musculus GN=Cpq PE=1 SV=1 - [CBPQ_MOUSE]                                             | 5.74     | 2               | 2        | 2    | 0.728        | <b>2.250</b>  | 1.307        |
| Q8R555     | Cartilage acidic protein 1 OS=Mus musculus GN=Crtac1 PE=2 SV=1 - [CRAC1_MOUSE]                                 | 4.80     | 2               | 2        | 2    | 0.955        | <b>2.217</b>  | 1.620        |
| P10605     | Cathepsin B OS=Mus musculus GN=Ctsb PE=1 SV=2 - [CATB_MOUSE]                                                   | 30.68    | 9               | 9        | 11   | <b>3.667</b> | <b>7.885</b>  | <b>5.122</b> |
| F8WIR1     | Cathepsin D OS=Mus musculus GN=Ctsd PE=1 SV=1 - [F8WIR1_MOUSE]                                                 | 9.49     | 2               | 2        | 3    | 1.609        | <b>2.402</b>  | 1.699        |
| Q9WUU7     | Cathepsin Z OS=Mus musculus GN=Ctsz PE=1 SV=1 - [CATZ_MOUSE]                                                   | 17.32    | 5               | 5        | 5    | <b>3.030</b> | <b>8.107</b>  | <b>2.966</b> |
| E0CY16     | Cell adhesion molecule 1 OS=Mus musculus GN=Cadm1 PE=1 SV=1 - [E0CY16_MOUSE]                                   | 17.18    | 2               | 5        | 5    | 0.974        | 1.547         | 1.300        |
| G3X9T8     | Ceruloplasmin OS=Mus musculus GN=Cp PE=1 SV=1 - [G3X9T8_MOUSE]                                                 | 6.98     | 6               | 6        | 50   | 0.674        | <b>2.216</b>  | 1.210        |
| P03953     | Cfd protein OS=Mus musculus GN=Cfd PE=2 SV=1 - [B7ZNS9_MOUSE]                                                  | 18.99    | 3               | 3        | 3    | <b>2.481</b> | <b>12.126</b> | <b>7.427</b> |
| Q03311     | Cholinesterase OS=Mus musculus GN=Bche PE=1 SV=2 - [CHLE_MOUSE]                                                | 4.31     | 2               | 2        | 2    | 0.749        | 1.602         | 1.227        |
| Q8K173     | Col3a1 protein (Fragment) OS=Mus musculus GN=Col3a1 PE=2 SV=1 - [Q8K173_MOUSE]                                 | 1.72     | 2               | 2        | 2    | <b>2.660</b> | <b>3.384</b>  | <b>2.419</b> |
| P11087     | Collagen alpha-1(I) chain OS=Mus musculus GN=Col1a1 PE=1 SV=4 - [CO1A1_MOUSE]                                  | 3.37     | 4               | 4        | 4    | <b>2.679</b> | <b>3.763</b>  | <b>2.071</b> |
| Q04857     | Collagen alpha-1(VI) chain OS=Mus musculus GN=Col6a1 PE=1 SV=1 - [CO6A1_MOUSE]                                 | 4.59     | 4               | 4        | 5    | 1.592        | <b>2.931</b>  | 1.989        |
| Q61245     | Collagen alpha-1(XI) chain OS=Mus musculus GN=Col11a1 PE=1 SV=2 - [COBA1_MOUSE]                                | 1.88     | 3               | 4        | 4    | 0.782        | <b>2.713</b>  | 1.494        |
| P01027     | Complement C3 OS=Mus musculus GN=C3 PE=1 SV=3 - [CO3_MOUSE]                                                    | 7.04     | 11              | 11       | 31   | 0.793        | <b>5.206</b>  | 1.879        |
| B2RWX2     | Complement component 4B (Childo blood group) OS=Mus musculus GN=C4b PE=2 SV=1 - [B2RWX2_MOUSE]                 | 1.73     | 3               | 3        | 3    | 0.556        | <b>2.797</b>  | 1.219        |
| H3BJW0     | Connective tissue growth factor OS=Mus musculus GN=Ctgf PE=1 SV=1 - [H3BJW0_MOUSE]                             | 7.85     | 2               | 2        | 2    | <b>2.068</b> | <b>3.607</b>  | 1.892        |
| P12960     | Contactin-1 OS=Mus musculus GN=Cntn1 PE=1 SV=1 - [CNTN1_MOUSE]                                                 | 2.35     | 2               | 2        | 2    | 1.220        | <b>2.589</b>  | 1.602        |

|            |                                                                                                                |       |   |   |    |               |               |               |
|------------|----------------------------------------------------------------------------------------------------------------|-------|---|---|----|---------------|---------------|---------------|
| P62897     | Cytochrome c, somatic OS=Mus musculus GN=Cycc PE=1 SV=2 - [CYC_MOUSE]                                          | 24.76 | 3 | 3 | 5  | 1.224         | <b>2.206</b>  | 1.538         |
| E9PZW0     | Desmoplakin OS=Mus musculus GN=Dsp PE=1 SV=1 - [E9PZW0_MOUSE]                                                  | 1.27  | 3 | 3 | 3  | <b>0.342</b>  | <b>2.726</b>  | 1.000         |
| Q9QU99     | Dickkopf-related protein 3 OS=Mus musculus GN=Dkk3 PE=2 SV=1 - [DKK3_MOUSE]                                    | 16.33 | 4 | 4 | 4  | <b>4.486</b>  | <b>9.849</b>  | <b>5.371</b>  |
| Q8BPB5     | EGF-containing fibulin-like extracellular matrix protein 1 OS=Mus musculus GN=Efemp1 PE=1 SV=1 - [FBLN3_MOUSE] | 4.67  | 2 | 2 | 3  | 0.888         | 2.277         | 0.830         |
| Q9ERV6     | Epidermal growth factor receptor isoform 2 OS=Mus musculus GN=Egfr PE=4 SV=1 - [Q9ERV6_MOUSE]                  | 6.69  | 3 | 3 | 3  | 0.881         | 2.083         | 1.047         |
| O09164     | Extracellular superoxide dismutase [Cu-Zn] OS=Mus musculus GN=Sod3 PE=1 SV=1 - [SODE_MOUSE]                    | 12.35 | 2 | 2 | 2  | <b>2.340</b>  | <b>6.509</b>  | <b>5.747</b>  |
| B7ZNJ1     | Fibronectin OS=Mus musculus GN=Fn1 PE=1 SV=1 - [B7ZNJ1_MOUSE]                                                  | 3.35  | 6 | 6 | 6  | 0.850         | <b>2.656</b>  | 1.310         |
| Q08879     | Fibulin-1 OS=Mus musculus GN=Fbln1 PE=1 SV=2 - [FBLN1_MOUSE]                                                   | 3.12  | 2 | 2 | 2  | 0.642         | 1.132         | 0.874         |
| Q62356     | Follistatin-related protein 1 OS=Mus musculus GN=Fstl1 PE=1 SV=2 - [FSTL1_MOUSE]                               | 5.56  | 2 | 2 | 2  | <b>21.167</b> | <b>19.100</b> | <b>9.835</b>  |
| B2RXT5     | Glucose-6-phosphate isomerase OS=Mus musculus GN=Gpi1 PE=2 SV=1 - [B2RXT5_MOUSE]                               | 8.43  | 2 | 2 | 3  | 0.779         | <b>3.186</b>  | 1.080         |
| Q61646     | Haptoglobin OS=Mus musculus GN=Hp PE=1 SV=1 - [HPT_MOUSE]                                                      | 11.53 | 4 | 4 | 14 | 1.499         | <b>3.834</b>  | 1.828         |
| P01942     | Hemoglobin subunit alpha OS=Mus musculus GN=Hba PE=1 SV=2 - [HBA_MOUSE]                                        | 19.01 | 2 | 2 | 5  | <b>0.483</b>  | 1.159         | 1.205         |
| P01868     | Ig gamma-1 chain C region secreted form OS=Mus musculus GN=Ighg1 PE=1 SV=1 - [IGHG1_MOUSE]                     | 5.86  | 2 | 2 | 2  | 0.797         | <b>2.166</b>  | 1.757         |
| B7ZWC4     | Insulin-like growth factor 2 receptor OS=Mus musculus GN=Igf2r PE=2 SV=1 - [B7ZWC4_MOUSE]                      | 1.13  | 2 | 2 | 2  | 0.648         | <b>4.921</b>  | 1.259         |
| H3BLB7     | Insulin-like growth factor-binding protein 4 OS=Mus musculus GN=Igfbp4 PE=1 SV=1 - [H3BLB7_MOUSE]              | 15.53 | 2 | 2 | 2  | <b>2.102</b>  | <b>12.270</b> | <b>3.305</b>  |
| P09055     | Integrin beta-1 OS=Mus musculus GN=Itgb1 PE=1 SV=1 - [ITB1_MOUSE]                                              | 2.38  | 2 | 2 | 2  | 0.551         | <b>2.296</b>  | 1.278         |
| Q61703     | Inter-alpha-trypsin inhibitor heavy chain H2 OS=Mus musculus GN=Itih2 PE=1 SV=1 - [ITIH2_MOUSE]                | 2.01  | 2 | 2 | 2  | 0.708         | <b>2.153</b>  | 1.266         |
| G3UY13     | Interleukin-1 receptor accessory protein OS=Mus musculus GN=Il1rap PE=4 SV=1 - [G3UY13_MOUSE]                  | 9.25  | 3 | 3 | 6  | 1.517         | <b>3.512</b>  | 1.617         |
| Q53VP8     | Kappa chain (Fragment) OS=Mus musculus PE=2 SV=1 - [Q53VP8_MOUSE]                                              | 19.64 | 2 | 2 | 2  | 0.747         | 1.516         | 1.113         |
| B8YJF9     | Lactoferrin OS=Mus musculus GN=Ltf PE=2 SV=1 - [B8YJF9_MOUSE]                                                  | 3.82  | 3 | 4 | 9  | <b>0.453</b>  | <b>2.087</b>  | 1.027         |
| A0A0R4J0I9 | Low density lipoprotein receptor-related protein 1 OS=Mus musculus GN=Lrp1 PE=1 SV=1 - [A0A0R4J0I9_MOUSE]      | 0.46  | 2 | 2 | 2  | 0.841         | 1.977         | 1.216         |
| P51885     | Lumican OS=Mus musculus GN=Lum PE=1 SV=2 - [LUM_MOUSE]                                                         | 11.54 | 3 | 3 | 7  | 0.851         | <b>2.714</b>  | 1.626         |
| B5THE2     | Maltase-glucoamylase OS=Mus musculus GN=Mgam PE=1 SV=1 - [B5THE2_MOUSE]                                        | 1.31  | 2 | 3 | 7  | 0.687         | 1.852         | 1.226         |
| O70423     | Membrane primary amine oxidase OS=Mus musculus GN=Aoc3 PE=1 SV=3 - [AOC3_MOUSE]                                | 5.36  | 3 | 3 | 8  | 0.641         | <b>2.041</b>  | 1.157         |
| P02798     | Metallothionein-2 OS=Mus musculus GN=Mt2 PE=1 SV=2 - [MT2_MOUSE]                                               | 21.31 | 2 | 2 | 3  | 0.530         | 0.740         | 0.746         |
| E9Q589     | Neural cell adhesion molecule 1 OS=Mus musculus GN=Ncam1 PE=1 SV=1 - [E9Q589_MOUSE]                            | 3.31  | 2 | 2 | 5  | 0.804         | <b>2.945</b>  | 1.251         |
| Q02819     | Nucleobindin-1 OS=Mus musculus GN=Nucb1 PE=1 SV=2 - [NUCB1_MOUSE]                                              | 23.97 | 9 | 9 | 11 | <b>4.225</b>  | <b>17.923</b> | <b>5.085</b>  |
| P20918     | Plasminogen OS=Mus musculus GN=Plg PE=1 SV=3 - [PLMN_MOUSE]                                                    | 4.56  | 2 | 2 | 3  | <b>0.476</b>  | 1.498         | 0.846         |
| E0CXB1     | Proteasome subunit alpha type-6 OS=Mus musculus GN=Psm6 PE=1 SV=1 - [E0CXB1_MOUSE]                             | 10.13 | 2 | 2 | 2  | 1.512         | <b>2.245</b>  | <b>2.740</b>  |
| Q3UDR2     | Protein disulfide-isomerase (Fragment) OS=Mus musculus GN=P4hb PE=2 SV=1 - [Q3UDR2_MOUSE]                      | 9.11  | 4 | 4 | 4  | 0.901         | 2.890         | 1.531         |
| B8JJN0     | Protein Gm20547 OS=Mus musculus GN=Gm20547 PE=4 SV=1 - [B8JJN0_MOUSE]                                          | 3.37  | 3 | 3 | 5  | 0.603         | <b>2.969</b>  | 1.528         |
| A0A0J9YVE6 | Protein Mgam OS=Mus musculus GN=Mgam PE=1 SV=1 - [A0A0J9YVE6_MOUSE]                                            | 2.42  | 2 | 3 | 6  | 0.758         | 1.945         | 1.216         |
| H7BX99     | Prothrombin OS=Mus musculus GN=F2 PE=1 SV=1 - [H7BX99_MOUSE]                                                   | 5.51  | 2 | 2 | 7  | 0.841         | <b>2.195</b>  | 1.197         |
| Q3UD81     | Putative uncharacterized protein (Fragment) OS=Mus musculus GN=Actg1 PE=2 SV=1 - [Q3UD81_MOUSE]                | 13.19 | 3 | 3 | 6  | 0.985         | <b>4.595</b>  | 1.301         |
| Q3UWP8     | Putative uncharacterized protein (Fragment) OS=Mus musculus GN=Calr PE=2 SV=1 - [Q3UWP8_MOUSE]                 | 18.75 | 5 | 5 | 5  | 1.135         | <b>5.427</b>  | <b>2.098</b>  |
| Q3TP88     | Putative uncharacterized protein (Fragment) OS=Mus musculus GN=Col1a2 PE=2 SV=1 - [Q3TP88_MOUSE]               | 2.71  | 2 | 2 | 2  | <b>5.488</b>  | <b>6.549</b>  | <b>3.497</b>  |
| Q3TR43     | Putative uncharacterized protein OS=Mus musculus GN=Dpp4 PE=2 SV=1 - [Q3TR43_MOUSE]                            | 2.33  | 2 | 2 | 3  | 0.629         | 1.954         | 1.417         |
| Q3TXQ4     | Putative uncharacterized protein OS=Mus musculus GN=Npc2 PE=2 SV=1 - [Q3TXQ4_MOUSE]                            | 16.78 | 2 | 2 | 2  | <b>39.939</b> | <b>60.295</b> | <b>44.861</b> |

|            |                                                                                                                 |       |    |    |    |              |               |              |
|------------|-----------------------------------------------------------------------------------------------------------------|-------|----|----|----|--------------|---------------|--------------|
| F8VQD7     | Receptor-type tyrosine-protein phosphatase gamma OS=Mus musculus GN=Ptpyg PE=1 SV=1 - [F8VQD7_MOUSE]            | 2.50  | 3  | 3  | 3  | 0.820        | <b>2.189</b>  | 1.415        |
| Q64374     | Regucalcin OS=Mus musculus GN=Rgn PE=1 SV=1 - [RGN_MOUSE]                                                       | 12.37 | 3  | 3  | 3  | 0.604        | <b>2.322</b>  | 1.874        |
| Q9QUR8     | Semaphorin-7A OS=Mus musculus GN=Sema7a PE=1 SV=1 - [SEM7A_MOUSE]                                               | 3.16  | 2  | 2  | 2  | 0.895        | 2.553         | 1.144        |
| Q921I1     | Serotransferrin OS=Mus musculus GN=Tf PE=1 SV=1 - [TRFE_MOUSE]                                                  | 21.23 | 16 | 17 | 64 | 0.704        | <b>2.488</b>  | 1.165        |
| P07724     | Serum albumin OS=Mus musculus GN=Alb PE=1 SV=3 - [ALBU_MOUSE]                                                   | 4.44  | 2  | 2  | 25 | 0.631        | <b>3.391</b>  | 1.486        |
| Q91VW3     | SH3 domain-binding glutamic acid-rich-like protein 3 OS=Mus musculus GN=Sh3bgrl3 PE=1 SV=1 - [SH3L3_MOUSE]      | 26.88 | 2  | 2  | 4  | 0.879        | 1.394         | 1.054        |
| Q5NCU4     | SPARC OS=Mus musculus GN=Sparc PE=1 SV=1 - [Q5NCU4_MOUSE]                                                       | 43.85 | 11 | 11 | 20 | <b>6.504</b> | <b>12.783</b> | <b>7.595</b> |
| P08228     | Superoxide dismutase [Cu-Zn] OS=Mus musculus GN=Sod1 PE=1 SV=2 - [SODC_MOUSE]                                   | 24.68 | 4  | 4  | 5  | 1.681        | <b>2.434</b>  | 1.514        |
| G4XXT0     | Testis-specific cytochrome c (Fragment) OS=Mus musculus GN=CYct PE=3 SV=1 - [G4XXT0_MOUSE]                      | 26.79 | 2  | 2  | 3  | 0.804        | 1.693         | 0.976        |
| P17751     | Triosephosphate isomerase OS=Mus musculus GN=Tpi1 PE=1 SV=4 - [TPIS_MOUSE]                                      | 16.72 | 4  | 4  | 8  | 0.622        | 1.512         | 0.936        |
| A2AIM4     | Tropomyosin beta chain OS=Mus musculus GN=Tpm2 PE=1 SV=1 - [A2AIM4_MOUSE]                                       | 7.39  | 2  | 2  | 2  | 1.796        | <b>3.617</b>  | 1.443        |
| P35917     | Vascular endothelial growth factor receptor 3 OS=Mus musculus GN=Flt4 PE=1 SV=1 - [VGFR3_MOUSE]                 | 1.69  | 2  | 2  | 2  | 0.756        | <b>3.102</b>  | 1.240        |
| A0A0A6YWC8 | Vimentin OS=Mus musculus GN=Vim PE=1 SV=1 - [A0A0A6YWC8_MOUSE]                                                  | 7.96  | 3  | 3  | 3  | <b>4.065</b> | <b>6.724</b>  | <b>2.217</b> |
| O08532     | Voltage-dependent calcium channel subunit alpha-2/delta-1 OS=Mus musculus GN=Cacna2d1 PE=1 SV=1 - [CA2D1_MOUSE] | 11.79 | 11 | 11 | 12 | 0.728        | <b>2.224</b>  | 1.130        |
| Q11136     | Xaa-Pro dipeptidase OS=Mus musculus GN=Pepd PE=1 SV=3 - [PEPD_MOUSE]                                            | 16.63 | 7  | 7  | 8  | 0.896        | <b>2.859</b>  | 1.373        |



# Supplementary Table 3B

| Accession  | Description                                                                                                     | Coverage | Unique Peptides | Peptides | PSMs | P OP9/Ctrl   | S OP9/Ctrl   | T OP9/Ctrl   |
|------------|-----------------------------------------------------------------------------------------------------------------|----------|-----------------|----------|------|--------------|--------------|--------------|
| P62258     | 14-3-3 protein epsilon OS=Homo sapiens GN=YWHAE PE=1 SV=1 - [1433E_HUMAN]                                       | 22.35    | 3               | 6        | 7    | 1.516        | <b>2.865</b> | <b>2.141</b> |
| P63104     | 14-3-3 protein zeta/delta OS=Homo sapiens GN=YWHAZ PE=1 SV=1 - [1433Z_HUMAN]                                    | 18.37    | 2               | 5        | 6    | 1.162        | <b>3.505</b> | 1.028        |
| I3L3I0     | Actin, cytoplasmic 2 (Fragment) OS=Homo sapiens GN=ACTG1 PE=1 SV=1 - [I3L3I0_HUMAN]                             | 14.49    | 3               | 3        | 6    | 0.985        | <b>4.595</b> | 1.301        |
| H0Y984     | ADP-ribosyl cyclase/cyclic ADP-ribose hydrolase 2 (Fragment) OS=Homo sapiens GN=BST1 PE=1 SV=1 - [H0Y984_HUMAN] | 11.83    | 2               | 2        | 2    | 0.773        | 1.951        | 1.321        |
| P43652     | Afamin OS=Homo sapiens GN=AFM PE=1 SV=1 - [AFAM_HUMAN]                                                          | 39.57    | 23              | 23       | 31   | 0.679        | <b>2.686</b> | 1.273        |
| Q6PID9     | Aggrecan OS=Homo sapiens GN=ACAN PE=1 SV=1 - [Q6PID9_HUMAN]                                                     | 4.30     | 3               | 3        | 3    | 0.883        | 1.758        | 1.036        |
| P02763     | Alpha-1-acid glycoprotein 1 OS=Homo sapiens GN=ORM1 PE=1 SV=1 - [A1AG1_HUMAN]                                   | 45.27    | 7               | 10       | 28   | 0.694        | 1.381        | 1.535        |
| P19652     | Alpha-1-acid glycoprotein 2 OS=Homo sapiens GN=ORM2 PE=1 SV=2 - [A1AG2_HUMAN]                                   | 43.78    | 6               | 9        | 15   | 0.591        | 1.310        | 1.250        |
| P01011     | Alpha-1-antichymotrypsin OS=Homo sapiens GN=SERPINA3 PE=1 SV=2 - [AACT_HUMAN]                                   | 25.06    | 10              | 10       | 16   | 0.676        | <b>3.225</b> | 1.400        |
| P01009     | Alpha-1-antitrypsin OS=Homo sapiens GN=SERPINA1 PE=1 SV=3 - [A1AT_HUMAN]                                        | 50.00    | 2               | 23       | 57   | <b>0.426</b> | 1.505        | <b>2.540</b> |
| P04217     | Alpha-1B-glycoprotein OS=Homo sapiens GN=A1BG PE=1 SV=4 - [A1BG_HUMAN]                                          | 34.95    | 12              | 12       | 40   | 0.756        | <b>2.407</b> | 1.313        |
| P08697     | Alpha-2-antiplasmin OS=Homo sapiens GN=SERPINF2 PE=1 SV=3 - [A2AP_HUMAN]                                        | 22.00    | 11              | 11       | 14   | 0.813        | <b>2.385</b> | 1.359        |
| P02765     | Alpha-2-HS-glycoprotein OS=Homo sapiens GN=AHSG PE=1 SV=1 - [FETUA_HUMAN]                                       | 55.31    | 18              | 18       | 68   | 0.928        | <b>3.507</b> | 1.433        |
| P01023     | Alpha-2-macroglobulin OS=Homo sapiens GN=A2M PE=1 SV=3 - [A2MG_HUMAN]                                           | 40.50    | 39              | 42       | 75   | <b>0.477</b> | 1.331        | <b>2.089</b> |
| Q6NSB3     | Alpha-amylase (Fragment) OS=Homo sapiens GN=AMY1A PE=2 SV=1 - [Q6NSB3_HUMAN]                                    | 13.74    | 6               | 6        | 7    | 1.519        | <b>3.621</b> | <b>2.324</b> |
| P15144     | Aminopeptidase N OS=Homo sapiens GN=ANPEP PE=1 SV=4 - [AMPN_HUMAN]                                              | 10.86    | 11              | 11       | 11   | 0.716        | <b>2.346</b> | 1.255        |
| P01008     | Antithrombin-III OS=Homo sapiens GN=SERPINC1 PE=1 SV=1 - [ANT3_HUMAN]                                           | 49.78    | 23              | 23       | 77   | 0.634        | 1.845        | 1.076        |
| P02647     | Apolipoprotein A-I OS=Homo sapiens GN=APOA1 PE=1 SV=1 - [APOA1_HUMAN]                                           | 39.33    | 10              | 10       | 15   | <b>0.321</b> | 1.002        | 0.685        |
| V9GYE3     | Apolipoprotein A-II OS=Homo sapiens GN=APOA2 PE=1 SV=1 - [V9GYE3_HUMAN]                                         | 40.38    | 3               | 3        | 3    | <b>0.460</b> | 1.304        | 0.783        |
| P06727     | Apolipoprotein A-IV OS=Homo sapiens GN=APOA4 PE=1 SV=3 - [APOA4_HUMAN]                                          | 75.00    | 33              | 33       | 87   | 0.836        | <b>3.060</b> | 1.450        |
| A0A0S2Z3V0 | Apolipoprotein E isoform 2 (Fragment) OS=Homo sapiens GN=APOE PE=2 SV=1 - [A0A0S2Z3V0_HUMAN]                    | 8.47     | 2               | 2        | 3    | 0.910        | <b>2.436</b> | 1.063        |
| Q13790     | Apolipoprotein F OS=Homo sapiens GN=APOF PE=1 SV=2 - [APOF_HUMAN]                                               | 8.28     | 2               | 2        | 2    | 0.914        | <b>2.403</b> | 1.376        |
| P08519     | Apolipoprotein(a) OS=Homo sapiens GN=LPA PE=1 SV=1 - [APOA_HUMAN]                                               | 7.30     | 2               | 2        | 5    | 1.000        | <b>2.887</b> | 1.232        |
| B7Z1I2     | Aspartate aminotransferase OS=Homo sapiens PE=2 SV=1 - [B7Z1I2_HUMAN]                                           | 5.74     | 2               | 2        | 2    | 0.808        | <b>3.594</b> | 1.409        |
| P25705     | ATP synthase subunit alpha, mitochondrial OS=Homo sapiens GN=ATP5A1 PE=1 SV=1 - [ATPA_HUMAN]                    | 3.62     | 2               | 2        | 2    | <b>0.440</b> | 1.903        | 1.145        |
| O75882     | Attractin OS=Homo sapiens GN=ATRN PE=1 SV=2 - [ATRN_HUMAN]                                                      | 24.42    | 31              | 31       | 51   | 0.758        | <b>2.148</b> | 1.235        |
| H0YLF3     | Beta-2-microglobulin (Fragment) OS=Homo sapiens GN=B2M PE=1 SV=1 - [H0YLF3_HUMAN]                               | 28.17    | 2               | 2        | 2    | 0.825        | <b>3.829</b> | 1.121        |
| P43251     | Biotinidase OS=Homo sapiens GN=BTD PE=1 SV=2 - [BTD_HUMAN]                                                      | 20.44    | 9               | 9        | 20   | 0.724        | <b>2.156</b> | 1.177        |
| K7ESE8     | Bleomycin hydrolase (Fragment) OS=Homo sapiens GN=BLMH PE=1 SV=1 - [K7ESE8_HUMAN]                               | 12.55    | 3               | 3        | 3    | 0.627        | <b>2.156</b> | 1.410        |
| A0A087X0X6 | Cadherin-13 OS=Homo sapiens GN=CDH13 PE=1 SV=1 - [A0A087X0X6_HUMAN]                                             | 12.86    | 6               | 6        | 6    | 1.125        | <b>2.007</b> | 0.954        |
| Q9BRL5     | CALM3 protein OS=Homo sapiens PE=1 SV=1 - [Q9BRL5_HUMAN]                                                        | 19.05    | 3               | 3        | 3    | 1.714        | <b>2.567</b> | 1.761        |
| Q53G71     | Calreticulin variant (Fragment) OS=Homo sapiens PE=2 SV=1 - [Q53G71_HUMAN]                                      | 21.18    | 8               | 8        | 9    | 1.133        | <b>4.206</b> | <b>2.098</b> |
| A0A024CIM4 | Carboxylic ester hydrolase OS=Homo sapiens PE=3 SV=1 - [A0A024CIM4_HUMAN]                                       | 22.92    | 14              | 14       | 18   | 0.732        | <b>2.290</b> | 1.236        |
| Q9Y646     | Carboxypeptidase Q OS=Homo sapiens GN=CPQ PE=1 SV=1 - [CBPQ_HUMAN]                                              | 5.72     | 2               | 2        | 2    | 0.728        | <b>2.250</b> | 1.307        |
| Q5T4F6     | Cartilage acidic protein 1 (Fragment) OS=Homo sapiens GN=CRTAC1 PE=1 SV=1 - [Q5T4F6_HUMAN]                      | 5.92     | 2               | 2        | 2    | 0.955        | <b>2.217</b> | 1.620        |
| P31944     | Caspase-14 OS=Homo sapiens GN=CASP14 PE=1 SV=2 - [CASPE_HUMAN]                                                  | 14.05    | 3               | 3        | 3    | 1.224        | 1.589        | <b>2.878</b> |
| Q5U000     | Cathepsin Z OS=Homo sapiens PE=2 SV=1 - [Q5U000_HUMAN]                                                          | 7.26     | 2               | 2        | 2    | 0.524        | <b>3.164</b> | 1.818        |



|            |                                                                                                                                                 |       |    |    |      |              |               |              |
|------------|-------------------------------------------------------------------------------------------------------------------------------------------------|-------|----|----|------|--------------|---------------|--------------|
| Q6YHK3     | CD109 antigen OS=Homo sapiens GN=CD109 PE=1 SV=2 - [CD109_HUMAN]                                                                                | 1.11  | 2  | 2  | 2    | 0.899        | 1.976         | 1.330        |
| F5GXJ9     | CD166 antigen OS=Homo sapiens GN=ALCAM PE=1 SV=1 - [F5GXJ9_HUMAN]                                                                               | 13.53 | 6  | 6  | 6    | 0.794        | 1.861         | 1.103        |
| H0YD13     | CD44 antigen OS=Homo sapiens GN=CD44 PE=1 SV=2 - [H0YD13_HUMAN]                                                                                 | 14.08 | 3  | 3  | 4    | 0.830        | 1.656         | 1.085        |
| B3KNB4     | cDNA FLJ14168 fis, clone NT2RP2001440, highly similar to 14-3-3 protein gamma OS=Homo sapiens PE=2 SV=1 - [B3KNB4_HUMAN]                        | 26.72 | 4  | 7  | 8    | <b>3.814</b> | <b>5.661</b>  | <b>5.400</b> |
| Q8N294     | cDNA FLJ33633 fis, clone BRAMY2022786, highly similar to Homo sapiens dickkopf-3 (DKK-3) mRNA OS=Homo sapiens PE=2 SV=1 - [Q8N294_HUMAN]        | 16.28 | 2  | 2  | 2    | <b>4.412</b> | <b>8.912</b>  | <b>3.526</b> |
| B4DPR2     | cDNA FLJ50830, highly similar to Serum albumin OS=Homo sapiens PE=2 SV=1 - [B4DPR2_HUMAN]                                                       | 24.09 | 16 | 16 | 123  | 0.631        | <b>3.250</b>  | 1.223        |
| B4DPN0     | cDNA FLJ51265, moderately similar to Beta-2-glycoprotein 1 (Beta-2-glycoprotein I) OS=Homo sapiens PE=2 SV=1 - [B4DPN0_HUMAN]                   | 19.34 | 4  | 4  | 4    | 0.540        | <b>3.972</b>  | 0.933        |
| B4DPP8     | cDNA FLJ53075, highly similar to Kininogen-1 OS=Homo sapiens PE=2 SV=1 - [B4DPP8_HUMAN]                                                         | 46.75 | 2  | 26 | 61   | 1.501        | <b>4.368</b>  | 1.356        |
| B4DNT6     | cDNA FLJ53631, highly similar to Intercellular adhesion molecule 1 OS=Homo sapiens PE=2 SV=1 - [B4DNT6_HUMAN]                                   | 7.01  | 3  | 3  | 3    | 0.886        | 1.706         | 1.181        |
| B4E1B2     | cDNA FLJ53691, highly similar to Serotransferrin OS=Homo sapiens PE=2 SV=1 - [B4E1B2_HUMAN]                                                     | 86.14 | 2  | 78 | 1208 | 0.661        | <b>2.452</b>  | 1.089        |
| B4E1B3     | cDNA FLJ53950, highly similar to Angiotensinogen OS=Homo sapiens PE=2 SV=1 - [B4E1B3_HUMAN]                                                     | 26.61 | 10 | 10 | 31   | 0.838        | <b>2.574</b>  | 1.421        |
| B4DVY2     | cDNA FLJ54184, highly similar to Tropomyosin alpha-4 chain OS=Homo sapiens PE=2 SV=1 - [B4DVY2_HUMAN]                                           | 12.66 | 3  | 3  | 3    | 1.653        | <b>3.688</b>  | 1.896        |
| B4E1I8     | cDNA FLJ54228, highly similar to Leucine-rich alpha-2-glycoprotein OS=Homo sapiens PE=2 SV=1 - [B4E1I8_HUMAN]                                   | 26.97 | 7  | 7  | 7    | 0.900        | <b>2.994</b>  | 1.346        |
| B4DNS6     | cDNA FLJ54278, highly similar to SPARC-like protein 1 OS=Homo sapiens PE=2 SV=1 - [B4DNS6_HUMAN]                                                | 7.51  | 3  | 3  | 3    | 0.740        | <b>2.224</b>  | 1.049        |
| B4DUI7     | cDNA FLJ55004, highly similar to Complement-activating component of Ra-reactive factor (EC 3.4.21.-) OS=Homo sapiens PE=2 SV=1 - [B4DUI7_HUMAN] | 5.93  | 2  | 2  | 3    | 0.875        | <b>2.621</b>  | 1.590        |
| B4DSV9     | cDNA FLJ56632, moderately similar to Target of Nesh-SH3 OS=Homo sapiens PE=2 SV=1 - [B4DSV9_HUMAN]                                              | 4.18  | 3  | 3  | 3    | 1.124        | <b>3.762</b>  | 1.434        |
| B4DMX4     | cDNA FLJ57154, highly similar to Alpha-fetoprotein OS=Homo sapiens PE=2 SV=1 - [B4DMX4_HUMAN]                                                   | 10.42 | 6  | 6  | 13   | <b>0.207</b> | 0.638         | <b>0.415</b> |
| B4DNH0     | cDNA FLJ60313, highly similar to Epithelial-cadherin OS=Homo sapiens PE=2 SV=1 - [B4DNH0_HUMAN]                                                 | 4.84  | 2  | 2  | 2    | 0.897        | 1.409         | 1.067        |
| A8K335     | cDNA FLJ76254, highly similar to Homo sapiens gamma-glutamyl hydrolase (GGH), mRNA OS=Homo sapiens PE=2 SV=1 - [A8K335_HUMAN]                   | 11.01 | 3  | 3  | 4    | 0.832        | <b>2.548</b>  | 1.453        |
| A8K5A4     | cDNA FLJ76826, highly similar to Homo sapiens ceruloplasmin (ferroxidase) (CP), mRNA OS=Homo sapiens PE=2 SV=1 - [A8K5A4_HUMAN]                 | 51.17 | 4  | 49 | 214  | 0.652        | <b>2.034</b>  | 1.176        |
| A8K6K4     | cDNA FLJ77565, highly similar to Homo sapiens IL1RAP, transcript variant 1, mRNA OS=Homo sapiens PE=2 SV=1 - [A8K6K4_HUMAN]                     | 8.42  | 6  | 6  | 11   | 1.309        | <b>3.191</b>  | 1.456        |
| A8K9A9     | cDNA FLJ77744, highly similar to Homo sapiens kallikrein B, plasma (Fletcher factor) 1 (KLKB1), mRNA OS=Homo sapiens PE=2 SV=1 - [A8K9A9_HUMAN] | 3.92  | 3  | 3  | 3    | 1.073        | <b>3.328</b>  | 1.126        |
| A8K7Q1     | cDNA FLJ77770, highly similar to Homo sapiens nucleobindin 1 (NUCB1), mRNA OS=Homo sapiens PE=2 SV=1 - [A8K7Q1_HUMAN]                           | 22.78 | 9  | 9  | 12   | <b>3.791</b> | <b>14.617</b> | <b>4.548</b> |
| A8KAJ3     | cDNA FLJ77823, highly similar to Homo sapiens EGF-containing FLECM protein 1, variant 3, mRNA OS=Homo sapiens PE=2 SV=1 - [A8KAJ3_HUMAN]        | 12.17 | 5  | 5  | 7    | 0.888        | 1.213         | 1.000        |
| B7ZAL5     | cDNA, FLJ79229, highly similar to Lactotransferrin (EC 3.4.21.-) OS=Homo sapiens PE=2 SV=1 - [B7ZAL5_HUMAN]                                     | 12.01 | 7  | 7  | 107  | 0.714        | 1.713         | 1.124        |
| B2R773     | cDNA, FLJ93312, highly similar to Homo sapiens adipose most abundant gene transcript 1 (APM1), mRNA OS=Homo sapiens PE=2 SV=1 - [B2R773_HUMAN]  | 12.30 | 2  | 2  | 4    | 1.625        | <b>14.310</b> | <b>3.742</b> |
| B2R9F2     | cDNA, FLJ94361, highly similar to Homo sapiens SERPINA6, mRNA OS=Homo sapiens PE=2 SV=1 - [B2R9F2_HUMAN]                                        | 28.64 | 9  | 9  | 15   | 0.786        | <b>2.456</b>  | 1.326        |
| B2RAN2     | cDNA, FLJ95014, highly similar to Homo sapiens vanin 1 (VNN1), mRNA OS=Homo sapiens PE=2 SV=1 - [B2RAN2_HUMAN]                                  | 17.54 | 7  | 7  | 17   | 0.748        | 1.987         | 1.252        |
| A0A087X0T8 | Cell adhesion molecule 1 OS=Homo sapiens GN=CADM1 PE=1 SV=1 - [A0A087X0T8_HUMAN]                                                                | 26.30 | 6  | 6  | 7    | 0.827        | 1.746         | 1.023        |
| G5E968     | Chromogranin A (Parathyroid secretory protein 1), isoform CRA_b OS=Homo sapiens GN=CHGA PE=1 SV=1 - [G5E968_HUMAN]                              | 9.15  | 2  | 2  | 2    | 1.009        | 1.342         | 0.915        |
| P10909     | Clusterin OS=Homo sapiens GN=CLU PE=1 SV=1 - [CLUS_HUMAN]                                                                                       | 9.35  | 4  | 4  | 4    | 0.701        | <b>2.210</b>  | 1.163        |
| Q14019     | Coactosin-like protein OS=Homo sapiens GN=COTL1 PE=1 SV=3 - [COTL1_HUMAN]                                                                       | 22.54 | 4  | 4  | 4    | 0.822        | <b>2.723</b>  | 1.449        |
| P12259     | Coagulation factor V OS=Homo sapiens GN=F5 PE=1 SV=4 - [FA5_HUMAN]                                                                              | 1.03  | 2  | 2  | 3    | 0.976        | <b>2.199</b>  | 0.968        |
| P00742     | Coagulation factor X OS=Homo sapiens GN=F10 PE=1 SV=2 - [FA10_HUMAN]                                                                            | 11.48 | 5  | 5  | 7    | 1.791        | <b>3.294</b>  | 1.840        |
| P02461     | Collagen alpha-1(III) chain OS=Homo sapiens GN=COL3A1 PE=1 SV=4 - [CO3A1_HUMAN]                                                                 | 2.18  | 3  | 3  | 5    | 0.824        | <b>2.454</b>  | 1.356        |
| A0A087X0S5 | Collagen alpha-1(VI) chain OS=Homo sapiens GN=COL6A1 PE=1 SV=1 - [A0A087X0S5_HUMAN]                                                             | 2.44  | 2  | 2  | 2    | 1.366        | <b>3.747</b>  | <b>2.916</b> |
| D3DTX7     | Collagen, type I, alpha 1, isoform CRA_a OS=Homo sapiens GN=COL1A1 PE=4 SV=1 - [D3DTX7_HUMAN]                                                   | 4.63  | 4  | 4  | 4    | <b>2.244</b> | 1.515         | 1.183        |
| D3DT71     | Collagen, type XI, alpha 1, isoform CRA_b OS=Homo sapiens GN=COL11A1 PE=4 SV=1 - [D3DT71_HUMAN]                                                 | 2.32  | 4  | 5  | 5    | 0.674        | 1.418         | 1.156        |

|            |                                                                                                                  |       |    |    |     |              |              |              |
|------------|------------------------------------------------------------------------------------------------------------------|-------|----|----|-----|--------------|--------------|--------------|
| B4DQI1     | Complement C2 OS=Homo sapiens GN=C2 PE=1 SV=1 - [B4DQI1_HUMAN]                                                   | 40.51 | 5  | 20 | 43  | 0.725        | <b>2.596</b> | 1.352        |
| P01024     | Complement C3 OS=Homo sapiens GN=C3 PE=1 SV=2 - [CO3_HUMAN]                                                      | 53.22 | 79 | 79 | 236 | 0.822        | <b>6.256</b> | <b>2.086</b> |
| A0A0G2JPR0 | Complement C4-A OS=Homo sapiens GN=C4A PE=1 SV=1 - [A0A0G2JPR0_HUMAN]                                            | 9.29  | 2  | 12 | 17  | 0.710        | <b>4.138</b> | 1.168        |
| G3XAM2     | Complement factor I OS=Homo sapiens GN=CFI PE=1 SV=1 - [G3XAM2_HUMAN]                                            | 22.05 | 3  | 10 | 12  | <b>0.410</b> | <b>2.389</b> | 1.379        |
| Q12860     | Contactin-1 OS=Homo sapiens GN=CNTN1 PE=1 SV=1 - [CNTN1_HUMAN]                                                   | 2.36  | 2  | 2  | 2   | 1.220        | <b>2.589</b> | 1.602        |
| P01040     | Cystatin-A OS=Homo sapiens GN=CSTA PE=1 SV=1 - [CYTA_HUMAN]                                                      | 25.51 | 2  | 2  | 2   | 0.929        | 1.130        | 1.177        |
| P54108     | Cysteine-rich secretory protein 3 OS=Homo sapiens GN=CRISP3 PE=1 SV=1 - [CRIS3_HUMAN]                            | 16.73 | 4  | 4  | 6   | 0.772        | 1.639        | 1.194        |
| C9JFR7     | Cytochrome c (Fragment) OS=Homo sapiens GN=CYCS PE=1 SV=1 - [C9JFR7_HUMAN]                                       | 18.81 | 2  | 2  | 4   | 1.110        | <b>2.109</b> | 1.389        |
| P81605     | Dermcidin OS=Homo sapiens GN=DCD PE=1 SV=2 - [DCD_HUMAN]                                                         | 20.00 | 3  | 3  | 4   | <b>0.440</b> | 0.780        | 1.388        |
| Q14117     | Dihydropyrimidinase OS=Homo sapiens GN=DPYS PE=1 SV=1 - [DPYS_HUMAN]                                             | 3.08  | 2  | 2  | 2   | 0.861        | <b>2.633</b> | 1.405        |
| HOYCY8     | Dipeptidyl peptidase 1 (Fragment) OS=Homo sapiens GN=CTSC PE=1 SV=7 - [HOYCY8_HUMAN]                             | 7.35  | 2  | 2  | 3   | 0.544        | 1.687        | 0.825        |
| P27487     | Dipeptidyl peptidase 4 OS=Homo sapiens GN=DPP4 PE=1 SV=2 - [DPP4_HUMAN]                                          | 8.62  | 7  | 7  | 10  | 0.611        | <b>2.035</b> | 1.210        |
| P09172     | Dopamine beta-hydroxylase OS=Homo sapiens GN=DBH PE=1 SV=3 - [DOPO_HUMAN]                                        | 8.27  | 4  | 4  | 4   | 0.675        | <b>2.043</b> | 1.150        |
| Q4LE79     | DSP variant protein (Fragment) OS=Homo sapiens GN=DSP variant protein PE=2 SV=1 - [Q4LE79_HUMAN]                 | 2.76  | 7  | 7  | 7   | <b>0.330</b> | 1.109        | 1.025        |
| Q68GS6     | Epidermal growth factor receptor (Fragment) OS=Homo sapiens GN=EGFR PE=2 SV=1 - [Q68GS6_HUMAN]                   | 5.43  | 3  | 3  | 3   | 0.564        | <b>2.083</b> | 1.307        |
| Q8WWE4     | FGL2 protein OS=Homo sapiens PE=2 SV=1 - [Q8WWE4_HUMAN]                                                          | 12.84 | 3  | 3  | 3   | 1.237        | <b>2.289</b> | 1.372        |
| P23142     | Fibulin-1 OS=Homo sapiens GN=FBLN1 PE=1 SV=4 - [FBLN1_HUMAN]                                                     | 6.97  | 5  | 5  | 5   | 0.745        | 1.182        | 0.827        |
| B7ZLE5     | FN1 protein OS=Homo sapiens GN=FN1 PE=2 SV=1 - [B7ZLE5_HUMAN]                                                    | 4.51  | 9  | 9  | 9   | 0.842        | <b>2.036</b> | 1.187        |
| Q12841     | Follistatin-related protein 1 OS=Homo sapiens GN=FSTL1 PE=1 SV=1 - [FSTL1_HUMAN]                                 | 17.21 | 6  | 6  | 7   | <b>3.321</b> | <b>6.862</b> | <b>2.824</b> |
| B7UCU6     | Gamma-globin chain (Fragment) OS=Homo sapiens GN=HBG2 PE=3 SV=1 - [B7UCU6_HUMAN]                                 | 23.81 | 2  | 3  | 7   | 0.612        | 1.341        | 0.869        |
| P06396     | Gelsolin OS=Homo sapiens GN=GSN PE=1 SV=1 - [GELS_HUMAN]                                                         | 3.71  | 3  | 3  | 5   | 0.582        | 1.733        | 1.166        |
| B4DE36     | Glucose-6-phosphate isomerase OS=Homo sapiens PE=2 SV=1 - [B4DE36_HUMAN]                                         | 6.98  | 3  | 3  | 4   | 0.785        | <b>2.706</b> | 1.243        |
| B0BCY7     | Glutamyl aminopeptidase (Aminopeptidase A) OS=Homo sapiens GN=ENPEP PE=2 SV=1 - [B0BCY7_HUMAN]                   | 1.78  | 2  | 2  | 2   | 0.947        | <b>3.467</b> | 1.494        |
| A0A087X1J7 | Glutathione peroxidase OS=Homo sapiens GN=GPX3 PE=1 SV=1 - [A0A087X1J7_HUMAN]                                    | 35.56 | 7  | 7  | 8   | <b>0.348</b> | 0.801        | <b>0.465</b> |
| Q8NBJ4     | Golgi membrane protein 1 OS=Homo sapiens GN=GOLM1 PE=1 SV=1 - [GOLM1_HUMAN]                                      | 4.74  | 2  | 2  | 3   | 0.582        | 1.985        | 1.372        |
| P00738     | Haptoglobin OS=Homo sapiens GN=HP PE=1 SV=1 - [HPT_HUMAN]                                                        | 58.62 | 25 | 25 | 62  | <b>0.490</b> | 1.237        | <b>2.102</b> |
| P68871     | Hemoglobin subunit beta OS=Homo sapiens GN=HBB PE=1 SV=2 - [HBB_HUMAN]                                           | 81.63 | 7  | 9  | 13  | <b>0.430</b> | 0.947        | 1.820        |
| A0A024RAB6 | Heparan sulfate proteoglycan 2 (Perlecan), isoform CRA_b OS=Homo sapiens GN=HSPG2 PE=4 SV=1 - [A0A024RAB6_HUMAN] | 0.41  | 2  | 2  | 2   | 0.972        | <b>3.106</b> | 1.480        |
| Q04756     | Hepatocyte growth factor activator OS=Homo sapiens GN=HGFA PE=1 SV=1 - [HGFA_HUMAN]                              | 4.27  | 3  | 3  | 3   | 0.791        | 1.901        | 1.278        |
| Q86Y23     | Hornerin OS=Homo sapiens GN=HRNR PE=1 SV=2 - [HORN_HUMAN]                                                        | 3.05  | 4  | 4  | 4   | 1.000        | 1.000        | 0.950        |
| P01861     | Ig gamma-4 chain C region OS=Homo sapiens GN=IGHG4 PE=1 SV=1 - [IGHG4_HUMAN]                                     | 37.00 | 3  | 9  | 15  | 0.522        | 1.423        | 1.466        |
| P01608     | Ig kappa chain V-I region Roy OS=Homo sapiens PE=1 SV=1 - [KV116_HUMAN]                                          | 24.07 | 2  | 2  | 2   | <b>0.401</b> | 1.218        | <b>2.058</b> |
| P01621     | Ig kappa chain V-III region NG9 (Fragment) OS=Homo sapiens PE=2 SV=1 - [KV303_HUMAN]                             | 25.00 | 2  | 2  | 2   | 0.714        | 1.395        | 1.076        |
| Q9Y6R7     | IgGfC-binding protein OS=Homo sapiens GN=FCGBP PE=1 SV=3 - [FCGBP_HUMAN]                                         | 0.65  | 2  | 2  | 2   | 0.706        | 1.644        | 0.740        |
| Q6PJF2     | IGK@ protein OS=Homo sapiens GN=IGK@ PE=1 SV=1 - [Q6PJF2_HUMAN]                                                  | 42.98 | 3  | 6  | 16  | <b>0.372</b> | 1.157        | <b>2.885</b> |
| Q8N355     | IGL@ protein OS=Homo sapiens GN=IGL@ PE=1 SV=1 - [Q8N355_HUMAN]                                                  | 46.58 | 3  | 10 | 21  | 0.620        | 1.440        | 0.910        |
| Q9NPP6     | Immunoglobulin heavy chain variant (Fragment) OS=Homo sapiens PE=2 SV=1 - [Q9NPP6_HUMAN]                         | 29.33 | 3  | 8  | 12  | <b>0.352</b> | 1.232        | <b>2.830</b> |
| F6MZK5     | Insulin (Fragment) OS=Homo sapiens GN=INS PE=2 SV=1 - [F6MZK5_HUMAN]                                             | 29.79 | 2  | 2  | 4   | 0.878        | 1.606        | 1.355        |

|            |                                                                                                                                    |       |    |    |    |              |               |              |
|------------|------------------------------------------------------------------------------------------------------------------------------------|-------|----|----|----|--------------|---------------|--------------|
| Q59EZ3     | Insulin-like growth factor 2 receptor variant (Fragment) OS=Homo sapiens PE=1 SV=1 - [Q59EZ3_HUMAN]                                | 1.33  | 4  | 4  | 5  | 0.615        | <b>2.560</b>  | 1.352        |
| P05556     | Integrin beta-1 OS=Homo sapiens GN=ITGB1 PE=1 SV=2 - [ITB1_HUMAN]                                                                  | 2.38  | 2  | 2  | 3  | 0.704        | <b>2.609</b>  | 1.363        |
| B2RMS9     | Inter-alpha (Globulin) inhibitor H4 (Plasma Kallikrein-sensitive glycoprotein) OS=Homo sapiens GN=ITIH4 PE=2 SV=1 - [B2RMS9_HUMAN] | 16.99 | 14 | 14 | 21 | 0.799        | <b>2.741</b>  | 1.526        |
| J3QQR8     | Intercellular adhesion molecule 2 (Fragment) OS=Homo sapiens GN=ICAM2 PE=1 SV=7 - [J3QQR8_HUMAN]                                   | 14.97 | 2  | 2  | 4  | 0.704        | 1.876         | 1.146        |
| P08637     | Low affinity immunoglobulin gamma Fc region receptor III-A OS=Homo sapiens GN=FCGR3A PE=1 SV=2 - [FCG3A_HUMAN]                     | 12.20 | 4  | 4  | 4  | 0.892        | <b>2.051</b>  | 1.172        |
| P51884     | Lumican OS=Homo sapiens GN=LUM PE=1 SV=2 - [LUM_HUMAN]                                                                             | 17.46 | 4  | 4  | 9  | 0.890        | <b>2.778</b>  | 1.626        |
| Q8TE24     | Maltase-glucoamylase (Fragment) OS=Homo sapiens GN=MGAM PE=3 SV=1 - [Q8TE24_HUMAN]                                                 | 5.19  | 8  | 11 | 28 | 0.738        | <b>2.011</b>  | 1.266        |
| Q16853     | Membrane primary amine oxidase OS=Homo sapiens GN=AOC3 PE=1 SV=3 - [AOC3_HUMAN]                                                    | 5.24  | 3  | 3  | 7  | 0.657        | 1.975         | 1.177        |
| A0A0K2BMD8 | Mutant hemoglobin alpha 2 globin chain OS=Homo sapiens GN=HBA2 PE=3 SV=1 - [A0A0K2BMD8_HUMAN]                                      | 57.04 | 5  | 5  | 9  | <b>0.495</b> | 1.588         | 0.967        |
| P02689     | Myelin P2 protein OS=Homo sapiens GN=PMP2 PE=1 SV=3 - [MYP2_HUMAN]                                                                 | 14.39 | 2  | 2  | 2  | <b>8.713</b> | <b>24.442</b> | <b>9.778</b> |
| P13535     | Myosin-8 OS=Homo sapiens GN=MYH8 PE=1 SV=3 - [MYH8_HUMAN]                                                                          | 0.88  | 2  | 2  | 2  | 0.714        | <b>2.842</b>  | 1.121        |
| Q96PD5     | N-acetylmuramoyl-L-alanine amidase OS=Homo sapiens GN=PGLYRP2 PE=1 SV=1 - [PGRP2_HUMAN]                                            | 6.08  | 2  | 2  | 2  | 0.669        | <b>2.658</b>  | 1.480        |
| A0A087X0M8 | Neural cell adhesion molecule L1-like protein OS=Homo sapiens GN=CHL1 PE=1 SV=1 - [A0A087X0M8_HUMAN]                               | 2.48  | 2  | 2  | 2  | 0.908        | <b>2.479</b>  | 1.218        |
| J3K000     | PEPD protein OS=Homo sapiens GN=PEPD PE=2 SV=1 - [J3K000_HUMAN]                                                                    | 10.34 | 4  | 4  | 4  | 0.674        | <b>2.844</b>  | 1.287        |
| Q6UXB8     | Peptidase inhibitor 16 OS=Homo sapiens GN=PI16 PE=1 SV=1 - [PI16_HUMAN]                                                            | 8.21  | 4  | 4  | 5  | 0.870        | <b>2.054</b>  | 1.201        |
| A0A0F7G8J1 | Plasminogen OS=Homo sapiens GN=PLG PE=2 SV=1 - [A0A0F7G8J1_HUMAN]                                                                  | 7.42  | 5  | 6  | 11 | 0.582        | 1.471         | 0.885        |
| P21246     | Pleiotrophin OS=Homo sapiens GN=PTN PE=1 SV=1 - [PTN_HUMAN]                                                                        | 10.71 | 2  | 2  | 2  | 1.315        | <b>12.138</b> | <b>4.589</b> |
| Q6SYC2     | Poliovirus receptor-related 1 (Fragment) OS=Homo sapiens GN=PVRL1 PE=4 SV=1 - [Q6SYC2_HUMAN]                                       | 9.13  | 2  | 2  | 2  | 0.869        | <b>3.661</b>  | 1.276        |
| F5H265     | Polyubiquitin-C (Fragment) OS=Homo sapiens GN=UBC PE=1 SV=1 - [F5H265_HUMAN]                                                       | 33.56 | 2  | 2  | 3  | 0.920        | 1.498         | 0.930        |
| Q59EE7     | Pro-alpha-1 type V collagen variant (Fragment) OS=Homo sapiens PE=2 SV=1 - [Q59EE7_HUMAN]                                          | 2.62  | 3  | 4  | 4  | 0.721        | <b>2.274</b>  | 0.995        |
| Q2M2H8     | Probable maltase-glucoamylase 2 OS=Homo sapiens GN=MGAM2 PE=2 SV=3 - [MGAL_HUMAN]                                                  | 2.19  | 3  | 5  | 15 | 0.603        | <b>2.112</b>  | 1.143        |
| Q5J7V8     | Proliferation-inducing gene 20 protein OS=Homo sapiens PE=2 SV=1 - [Q5J7V8_HUMAN]                                                  | 19.39 | 2  | 2  | 2  | <b>0.192</b> | <b>2.359</b>  | 1.366        |
| Q07954     | Prolow-density lipoprotein receptor-related protein 1 OS=Homo sapiens GN=LRP1 PE=1 SV=2 - [LRP1_HUMAN]                             | 0.46  | 2  | 2  | 2  | 0.841        | 1.977         | 1.216        |
| P41222     | Prostaglandin-H2 D-isomerase OS=Homo sapiens GN=PTGDS PE=1 SV=1 - [PTGDS_HUMAN]                                                    | 12.63 | 2  | 2  | 2  | 0.760        | 1.984         | 0.920        |
| G3V295     | Proteasome subunit alpha type OS=Homo sapiens GN=PSMA6 PE=1 SV=1 - [G3V295_HUMAN]                                                  | 11.33 | 2  | 2  | 2  | 1.512        | <b>2.245</b>  | <b>2.740</b> |
| P02760     | Protein AMBP OS=Homo sapiens GN=AMBP PE=1 SV=1 - [AMBP_HUMAN]                                                                      | 36.36 | 11 | 11 | 49 | 1.584        | <b>4.837</b>  | <b>2.040</b> |
| C9IZG4     | Protein CutA OS=Homo sapiens GN=CUA PE=1 SV=1 - [C9IZG4_HUMAN]                                                                     | 20.74 | 2  | 2  | 2  | 0.721        | 1.622         | 1.226        |
| Q99497     | Protein deglycase DJ-1 OS=Homo sapiens GN=PARK7 PE=1 SV=2 - [PARK7_HUMAN]                                                          | 18.52 | 2  | 2  | 2  | 0.582        | <b>2.696</b>  | 0.927        |
| B3KQT9     | Protein disulfide-isomerase OS=Homo sapiens PE=2 SV=1 - [B3KQT9_HUMAN]                                                             | 4.38  | 2  | 2  | 2  | 0.672        | <b>3.464</b>  | 1.998        |
| B4DNL5     | Protein disulfide-isomerase OS=Homo sapiens PE=2 SV=1 - [B4DNL5_HUMAN]                                                             | 9.35  | 4  | 4  | 4  | 0.901        | <b>2.890</b>  | 1.531        |
| Q9ULI3     | Protein HEG homolog 1 OS=Homo sapiens GN=HEG1 PE=1 SV=3 - [HEG1_HUMAN]                                                             | 1.16  | 2  | 2  | 3  | 0.832        | 1.560         | 1.292        |
| A0A087WW89 | Protein IGHV3-72 OS=Homo sapiens GN=IGHV3-72 PE=1 SV=1 - [A0A087WW89_HUMAN]                                                        | 29.70 | 2  | 2  | 4  | 0.519        | 1.519         | 1.834        |
| A0A0A0MTQ6 | Protein IGKV2D-28 OS=Homo sapiens GN=IGKV2D-28 PE=1 SV=1 - [A0A0A0MTQ6_HUMAN]                                                      | 36.27 | 2  | 2  | 2  | 0.553        | 1.954         | 1.344        |
| P31151     | Protein S100-A7 OS=Homo sapiens GN=S100A7 PE=1 SV=4 - [S10A7_HUMAN]                                                                | 24.75 | 2  | 2  | 2  | 1.478        | 1.096         | 1.470        |
| A0A096LPE2 | Protein SAA2-SAA4 OS=Homo sapiens GN=SAA2-SAA4 PE=4 SV=1 - [A0A096LPE2_HUMAN]                                                      | 8.17  | 2  | 2  | 2  | 0.515        | 1.445         | <b>0.298</b> |
| A0A0C4DFV9 | Protein SET OS=Homo sapiens GN=SET PE=1 SV=1 - [A0A0C4DFV9_HUMAN]                                                                  | 6.39  | 2  | 2  | 2  | <b>2.181</b> | <b>2.910</b>  | 1.062        |
| A0A0U1RR20 | Proteoglycan 4 OS=Homo sapiens GN=PRG4 PE=1 SV=1 - [A0A0U1RR20_HUMAN]                                                              | 15.50 | 10 | 10 | 13 | 0.832        | 1.815         | 1.033        |
| E9PIT3     | Prothrombin OS=Homo sapiens GN=F2 PE=1 SV=1 - [E9PIT3_HUMAN]                                                                       | 30.87 | 15 | 15 | 61 | 0.805        | <b>2.052</b>  | 1.136        |

|            |                                                                                                                                          |       |    |    |     |              |              |              |
|------------|------------------------------------------------------------------------------------------------------------------------------------------|-------|----|----|-----|--------------|--------------|--------------|
| Q5BJH1     | PSAP protein OS=Homo sapiens GN=PSAP PE=1 SV=1 - [Q5BJH1_HUMAN]                                                                          | 7.08  | 2  | 2  | 2   | 1.152        | <b>3.213</b> | 1.574        |
| Q9NPR5     | PTPRJ, protein tyrosine phosphatase receptor J, eta (Fragment) OS=Homo sapiens PE=2 SV=1 - [Q9NPR5_HUMAN]                                | 7.76  | 2  | 2  | 2   | 0.778        | <b>2.002</b> | 1.131        |
| Q6N093     | Putative uncharacterized protein DKFZp686I04196 (Fragment) OS=Homo sapiens GN=DKFZp686I04196 PE=2 SV=1 - [Q6N093_HUMAN]                  | 32.37 | 3  | 11 | 20  | <b>0.300</b> | 1.067        | 1.844        |
| Q6N092     | Putative uncharacterized protein DKFZp686K18196 (Fragment) OS=Homo sapiens GN=DKFZp686K18196 PE=2 SV=1 - [Q6N092_HUMAN]                  | 38.15 | 9  | 14 | 18  | <b>0.454</b> | 1.227        | <b>2.330</b> |
| Q5CZ94     | Putative uncharacterized protein DKFZp781M0386 OS=Homo sapiens GN=DKFZp781M0386 PE=2 SV=1 - [Q5CZ94_HUMAN]                               | 29.91 | 3  | 6  | 12  | 0.546        | 1.490        | 1.292        |
| A0A087WWP7 | Receptor-type tyrosine-protein phosphatase gamma OS=Homo sapiens GN=PTPRG PE=1 SV=1 - [A0A087WWP7_HUMAN]                                 | 3.18  | 4  | 4  | 4   | 0.802        | <b>2.102</b> | 1.241        |
| Q15493     | Regucalcin OS=Homo sapiens GN=RGN PE=1 SV=1 - [RGN_HUMAN]                                                                                | 11.04 | 3  | 3  | 3   | 0.604        | 1.583        | 1.114        |
| Q96D15     | Reticulocalbin-3 OS=Homo sapiens GN=RCN3 PE=1 SV=1 - [RCN3_HUMAN]                                                                        | 8.84  | 2  | 2  | 2   | 0.829        | 1.703        | 1.077        |
| A0A0C4DGV7 | Retinol-binding protein 4 OS=Homo sapiens GN=RBP4 PE=1 SV=1 - [A0A0C4DGV7_HUMAN]                                                         | 47.74 | 6  | 6  | 9   | <b>0.441</b> | <b>2.469</b> | 0.902        |
| F5GZZ9     | Scavenger receptor cysteine-rich type 1 protein M130 OS=Homo sapiens GN=CD163 PE=1 SV=1 - [F5GZZ9_HUMAN]                                 | 8.57  | 8  | 8  | 9   | 0.699        | <b>2.307</b> | 1.365        |
| O75326     | Semaphorin-7A OS=Homo sapiens GN=SEMA7A PE=1 SV=1 - [SEMA7A_HUMAN]                                                                       | 3.15  | 2  | 2  | 3   | 0.878        | 1.959        | 1.169        |
| F2RM35     | Serine protease OS=Homo sapiens GN=factor IX F9 PE=2 SV=1 - [F2RM35_HUMAN]                                                               | 4.34  | 2  | 2  | 2   | 1.338        | <b>3.685</b> | 1.485        |
| Q5UGI6     | Serine/cysteine proteinase inhibitor clade G member 1 splice variant 2 (Fragment) OS=Homo sapiens GN=SERPING1 PE=2 SV=1 - [Q5UGI6_HUMAN] | 21.62 | 7  | 7  | 9   | 0.564        | <b>2.910</b> | 1.256        |
| C9J7N5     | Serpin I2 (Fragment) OS=Homo sapiens GN=SERPINI2 PE=1 SV=1 - [C9J7N5_HUMAN]                                                              | 8.25  | 2  | 2  | 2   | 0.636        | <b>2.325</b> | 1.501        |
| P02743     | Serum amyloid P-component OS=Homo sapiens GN=APCS PE=1 SV=2 - [SAMP_HUMAN]                                                               | 14.35 | 3  | 3  | 5   | 0.960        | <b>3.509</b> | 1.628        |
| Q5T123     | SH3 domain-binding glutamic acid-rich-like protein 3 OS=Homo sapiens GN=SH3BGRL3 PE=1 SV=1 - [Q5T123_HUMAN]                              | 36.36 | 3  | 3  | 5   | 0.673        | 1.330        | 1.030        |
| Q5TFQ8     | Signal-regulatory protein beta-1 isoform 3 OS=Homo sapiens GN=SIRPB1 PE=1 SV=1 - [SIRBL_HUMAN]                                           | 7.29  | 2  | 2  | 2   | 0.717        | <b>2.134</b> | 1.254        |
| P09486     | SPARC OS=Homo sapiens GN=SPARC PE=1 SV=1 - [SPRC_HUMAN]                                                                                  | 40.59 | 14 | 14 | 23  | <b>3.167</b> | <b>8.240</b> | <b>3.885</b> |
| H7BYH4     | Superoxide dismutase [Cu-Zn] OS=Homo sapiens GN=SOD1 PE=1 SV=1 - [H7BYH4_HUMAN]                                                          | 20.00 | 3  | 3  | 4   | 0.980        | 1.660        | 1.234        |
| Q6UWP8     | Suprabasin OS=Homo sapiens GN=SBSN PE=1 SV=2 - [SBSN_HUMAN]                                                                              | 15.25 | 2  | 2  | 4   | 0.641        | 0.672        | 1.596        |
| E9PHK0     | Tetranectin OS=Homo sapiens GN=CLEC3B PE=1 SV=1 - [E9PHK0_HUMAN]                                                                         | 28.75 | 3  | 3  | 4   | 1.002        | <b>2.990</b> | 1.928        |
| P62328     | Thymosin beta-4 OS=Homo sapiens GN=TMSB4X PE=1 SV=2 - [TYB4_HUMAN]                                                                       | 31.82 | 3  | 3  | 4   | 1.021        | 1.878        | 1.066        |
| P05543     | Thyroxine-binding globulin OS=Homo sapiens GN=SERPINA7 PE=1 SV=2 - [THBG_HUMAN]                                                          | 40.96 | 15 | 15 | 37  | 0.749        | <b>2.168</b> | 1.256        |
| D3DPF9     | Titin, isoform CRA_b OS=Homo sapiens GN=TTN PE=4 SV=1 - [D3DPF9_HUMAN]                                                                   | 0.05  | 2  | 2  | 3   | 0.600        | <b>2.428</b> | 1.158        |
| J3KQ45     | Trans-Golgi network integral membrane protein 2 OS=Homo sapiens GN=TGOLN2 PE=1 SV=1 - [J3KQ45_HUMAN]                                     | 9.91  | 4  | 4  | 4   | 0.988        | <b>3.136</b> | 0.998        |
| P37837     | Transaldolase OS=Homo sapiens GN=TALDO1 PE=1 SV=2 - [TALDO_HUMAN]                                                                        | 6.23  | 2  | 2  | 2   | 0.662        | 1.655        | 0.946        |
| P02766     | Transthyretin OS=Homo sapiens GN=TTR PE=1 SV=1 - [TTHY_HUMAN]                                                                            | 77.55 | 10 | 10 | 55  | 0.850        | 1.780        | 1.080        |
| Q53HE2     | Triosephosphate isomerase (Fragment) OS=Homo sapiens PE=2 SV=1 - [Q53HE2_HUMAN]                                                          | 28.11 | 6  | 6  | 9   | 0.607        | 1.369        | 0.953        |
| Q9GZX9     | Twisted gastrulation protein homolog 1 OS=Homo sapiens GN=TWSG1 PE=1 SV=1 - [TWSG1_HUMAN]                                                | 8.52  | 2  | 2  | 2   | 1.145        | <b>4.876</b> | 1.285        |
| B4E1Z4     | Uncharacterized protein OS=Homo sapiens PE=1 SV=1 - [B4E1Z4_HUMAN]                                                                       | 26.54 | 16 | 31 | 62  | 0.614        | <b>2.176</b> | 1.088        |
| Q8NEJ1     | Uncharacterized protein OS=Homo sapiens PE=2 SV=1 - [Q8NEJ1_HUMAN]                                                                       | 38.56 | 2  | 9  | 18  | 0.693        | 1.386        | 0.892        |
| F8UU18     | Vascular cell adhesion molecule 1 (Fragment) OS=Homo sapiens GN=VCAM1 PE=4 SV=1 - [F8UU18_HUMAN]                                         | 10.26 | 2  | 2  | 2   | <b>0.457</b> | <b>2.392</b> | 1.053        |
| Q59F24     | Vascular endothelial growth factor receptor 3 variant (Fragment) OS=Homo sapiens PE=2 SV=1 - [Q59F24_HUMAN]                              | 3.70  | 2  | 2  | 3   | 0.771        | <b>3.404</b> | 1.555        |
| B0YJC4     | Vimentin OS=Homo sapiens GN=VIM PE=1 SV=1 - [B0YJC4_HUMAN]                                                                               | 9.05  | 3  | 4  | 5   | <b>5.656</b> | <b>7.561</b> | <b>4.993</b> |
| Q5JQ13     | Vinculin (Fragment) OS=Homo sapiens GN=VCL PE=1 SV=1 - [Q5JQ13_HUMAN]                                                                    | 2.23  | 2  | 2  | 2   | 0.878        | <b>2.412</b> | 1.051        |
| D6RF35     | Vitamin D-binding protein OS=Homo sapiens GN=GC PE=1 SV=1 - [D6RF35_HUMAN]                                                               | 74.37 | 2  | 41 | 245 | 0.702        | 1.881        | 1.147        |
| P02774     | Vitamin D-binding protein OS=Homo sapiens GN=GC PE=1 SV=1 - [VTDB_HUMAN]                                                                 | 79.96 | 3  | 42 | 242 | 0.726        | 1.954        | 1.111        |
| P04004     | Vitronectin OS=Homo sapiens GN=VTN PE=1 SV=1 - [VTNC_HUMAN]                                                                              | 10.46 | 5  | 5  | 7   | 1.007        | <b>2.874</b> | 1.134        |

|        |                                                                                                                 |       |    |    |    |       |              |       |
|--------|-----------------------------------------------------------------------------------------------------------------|-------|----|----|----|-------|--------------|-------|
| P54289 | Voltage-dependent calcium channel subunit alpha-2/delta-1 OS=Homo sapiens GN=CACNA2D1 PE=1 SV=3 - [CA2D1_HUMAN] | 13.15 | 12 | 12 | 13 | 0.746 | <b>2.146</b> | 1.219 |
| Q2M389 | WASH complex subunit 7 OS=Homo sapiens GN=KIAA1033 PE=1 SV=2 - [WASH7_HUMAN]                                    | 0.85  | 2  | 2  | 2  | 0.660 | <b>2.016</b> | 0.670 |
| P25311 | Zinc-alpha-2-glycoprotein OS=Homo sapiens GN=AZGP1 PE=1 SV=2 - [ZA2G_HUMAN]                                     | 58.39 | 22 | 22 | 84 | 0.772 | 1.775        | 1.034 |



# Supplementary Table 3C

| Accession | Description                                                                                     | Coverage | Unique Peptides | Peptides | PSMs | P OP9/Ctrl   | S OP9/Ctrl   | T OP9/Ctrl   |
|-----------|-------------------------------------------------------------------------------------------------|----------|-----------------|----------|------|--------------|--------------|--------------|
| P62261    | 14-3-3 protein epsilon OS=Bos taurus GN=YWHAE PE=2 SV=1 - [1433E_BOVIN]                         | 22.35    | 3               | 6        | 7    | 1.516        | 2.865        | 2.141        |
| A7Z057    | 14-3-3 protein gamma OS=Bos taurus GN=YWHAG PE=1 SV=1 - [A7Z057_BOVIN]                          | 26.72    | 3               | 7        | 8    | <b>3.814</b> | <b>5.661</b> | <b>5.400</b> |
| P63103    | 14-3-3 protein zeta/delta OS=Bos taurus GN=YWHAZ PE=1 SV=1 - [1433Z_BOVIN]                      | 18.37    | 2               | 5        | 6    | 1.162        | 3.505        | 1.028        |
| P82915    | 28S ribosomal protein S16, mitochondrial OS=Bos taurus GN=MRPS16 PE=1 SV=2 - [RT16_BOVIN]       | 20.74    | 2               | 2        | 2    | 0.762        | 1.657        | 0.989        |
| Q5EA20    | 4-hydroxyphenylpyruvate dioxygenase OS=Bos taurus GN=HPD PE=2 SV=3 - [HPPD_BOVIN]               | 6.36     | 2               | 2        | 2    | 0.835        | 1.470        | 0.975        |
| Q95M17    | Acidic mammalian chitinase OS=Bos taurus GN=CHIA PE=1 SV=1 - [CHIA_BOVIN]                       | 17.80    | 7               | 7        | 13   | 0.732        | 2.694        | 1.569        |
| F1MRD0    | Actin, cytoplasmic 1 OS=Bos taurus GN=ACTB PE=3 SV=2 - [F1MRD0_BOVIN]                           | 8.27     | 3               | 3        | 6    | 0.985        | 4.595        | 1.301        |
| P07107    | Acyl-CoA-binding protein OS=Bos taurus GN=DBI PE=1 SV=2 - [ACBP_BOVIN]                          | 36.78    | 3               | 3        | 3    | 0.783        | 2.252        | 1.123        |
| Q3Y5Z3    | Adiponectin OS=Bos taurus GN=ADIPOQ PE=1 SV=1 - [ADIPO_BOVIN]                                   | 25.42    | 5               | 5        | 11   | 0.701        | 2.195        | 1.299        |
| Q6XL68    | Aggrecan OS=Bos taurus PE=4 SV=1 - [Q6XL68_BOVIN]                                               | 3.07     | 6               | 6        | 6    | 0.881        | 1.978        | 1.060        |
| B0JYQ0    | ALB protein OS=Bos taurus GN=ALB PE=2 SV=1 - [B0JYQ0_BOVIN]                                     | 85.67    | 2               | 83       | 1360 | <b>0.442</b> | <b>3.376</b> | 1.010        |
| Q5EA79    | Aldose 1-epimerase OS=Bos taurus GN=GALM PE=2 SV=1 - [GALM_BOVIN]                               | 6.14     | 2               | 2        | 3    | 0.801        | 3.315        | 1.218        |
| P09487    | Alkaline phosphatase, tissue-nonspecific isozyme OS=Bos taurus GN=ALPL PE=1 SV=2 - [PPBT_BOVIN] | 4.20     | 2               | 2        | 2    | 0.697        | 1.594        | 1.091        |
| Q28133    | Allergen Bos d 2 OS=Bos taurus PE=1 SV=1 - [ALL2_BOVIN]                                         | 36.63    | 6               | 6        | 7    | 0.796        | 1.886        | 1.127        |
| Q3SZR3    | Alpha-1-acid glycoprotein OS=Bos taurus GN=ORM1 PE=2 SV=1 - [A1AG_BOVIN]                        | 68.81    | 19              | 19       | 325  | 0.889        | 1.685        | 1.036        |
| P34955    | Alpha-1-antitrypsin OS=Bos taurus GN=SERPINA1 PE=1 SV=1 - [A1AT_BOVIN]                          | 62.50    | 33              | 33       | 580  | 0.922        | <b>2.281</b> | 1.247        |
| Q2KJF1    | Alpha-1B-glycoprotein OS=Bos taurus GN=A1BG PE=1 SV=1 - [A1BG_BOVIN]                            | 59.44    | 20              | 20       | 105  | 0.747        | <b>2.355</b> | 1.186        |
| P28800    | Alpha-2-antiplasmin OS=Bos taurus GN=SERPINF2 PE=1 SV=2 - [A2AP_BOVIN]                          | 33.54    | 19              | 19       | 57   | 0.870        | 2.279        | 1.420        |
| P12763    | Alpha-2-HS-glycoprotein OS=Bos taurus GN=AHSG PE=1 SV=2 - [FETUA_BOVIN]                         | 49.86    | 22              | 22       | 279  | 0.999        | <b>3.218</b> | 1.287        |
| Q7SIH1    | Alpha-2-macroglobulin OS=Bos taurus GN=A2M PE=1 SV=2 - [A2MG_BOVIN]                             | 27.68    | 7               | 33       | 47   | 0.603        | 1.941        | 1.896        |
| F1MJQ3    | Alpha-amylase OS=Bos taurus GN=AMY2B PE=3 SV=1 - [F1MJQ3_BOVIN]                                 | 30.53    | 13              | 13       | 18   | 1.374        | 3.838        | 2.261        |
| Q3SZ57    | Alpha-fetoprotein OS=Bos taurus GN=AFP PE=2 SV=1 - [FETA_BOVIN]                                 | 76.07    | 42              | 43       | 170  | <b>0.190</b> | 0.644        | <b>0.413</b> |
| P02662    | Alpha-S1-casein OS=Bos taurus GN=CSN1S1 PE=1 SV=2 - [CASA1_BOVIN]                               | 40.65    | 8               | 8        | 9    | 0.708        | 11.800       | 0.695        |
| P02663    | Alpha-S2-casein OS=Bos taurus GN=CSN1S2 PE=1 SV=2 - [CASA2_BOVIN]                               | 9.01     | 2               | 2        | 2    | 1.069        | 3.786        | 1.320        |
| E1BC10    | Amine oxidase OS=Bos taurus GN=AOC3 PE=1 SV=1 - [E1BC10_BOVIN]                                  | 24.12    | 4               | 16       | 76   | 0.816        | <b>2.888</b> | 1.134        |
| E1BJN3    | Amine oxidase OS=Bos taurus PE=3 SV=1 - [E1BJN3_BOVIN]                                          | 35.67    | 10              | 17       | 89   | 0.735        | <b>2.147</b> | 1.164        |
| F1MN84    | Aminopeptidase N OS=Bos taurus GN=ANPEP PE=4 SV=2 - [F1MN84_BOVIN]                              | 15.54    | 15              | 15       | 17   | 0.714        | 2.026        | 1.182        |
| Q2KJB3    | Angiopoietin-like 3 OS=Bos taurus GN=ANGPTL3 PE=2 SV=1 - [Q2KJB3_BOVIN]                         | 6.32     | 2               | 2        | 3    | 0.656        | 2.661        | 1.099        |
| F1MQJ0    | Angiotensin-converting enzyme OS=Bos taurus GN=ACE PE=3 SV=2 - [F1MQJ0_BOVIN]                   | 9.95     | 12              | 12       | 12   | 0.694        | 2.109        | 1.235        |
| Q3SZH5    | Angiotensinogen OS=Bos taurus GN=AGT PE=2 SV=1 - [Q3SZH5_BOVIN]                                 | 10.85    | 3               | 3        | 4    | 1.071        | 1.958        | 2.588        |
| F1MSZ6    | Antithrombin-III OS=Bos taurus GN=SERPINC1 PE=1 SV=1 - [F1MSZ6_BOVIN]                           | 62.37    | 34              | 34       | 270  | 0.667        | 1.915        | 1.157        |
| P15497    | Apolipoprotein A-I OS=Bos taurus GN=APOA1 PE=1 SV=3 - [APOA1_BOVIN]                             | 61.89    | 18              | 18       | 31   | 0.694        | 2.529        | 1.384        |
| P81644    | Apolipoprotein A-II OS=Bos taurus GN=APOA2 PE=1 SV=2 - [APOA2_BOVIN]                            | 21.00    | 3               | 3        | 3    | 0.493        | 1.567        | 0.862        |
| F1N3Q7    | Apolipoprotein A-IV OS=Bos taurus GN=APOA4 PE=3 SV=1 - [F1N3Q7_BOVIN]                           | 71.32    | 31              | 31       | 82   | 0.900        | <b>3.232</b> | 1.600        |
| P19035    | Apolipoprotein C-III OS=Bos taurus GN=APOC3 PE=1 SV=2 - [APOC3_BOVIN]                           | 22.92    | 2               | 2        | 3    | 0.449        | 2.237        | 0.869        |
| F1MS32    | Apolipoprotein D OS=Bos taurus GN=APOD PE=3 SV=2 - [F1MS32_BOVIN]                               | 20.11    | 3               | 3        | 3    | 1.000        | 2.883        | 1.779        |
| Q0ZCB4    | Apolipoprotein E (Fragment) OS=Bos taurus PE=3 SV=1 - [Q0ZCB4_BOVIN]                            | 10.55    | 3               | 3        | 4    | 0.820        | 1.665        | 1.059        |

|            |                                                                                                 |       |    |    |    |       |        |       |
|------------|-------------------------------------------------------------------------------------------------|-------|----|----|----|-------|--------|-------|
| Q2KIH2     | ApoN protein OS=Bos taurus GN=ApoN PE=2 SV=1 - [Q2KIH2_BOVIN]                                   | 12.20 | 3  | 3  | 4  | 0.899 | 2.588  | 1.417 |
| P33097     | Aspartate aminotransferase, cytoplasmic OS=Bos taurus GN=GOT1 PE=1 SV=3 - [AATC_BOVIN]          | 20.58 | 7  | 7  | 8  | 0.808 | 2.858  | 1.402 |
| Q1RMN0     | Aspartylglucosaminidase OS=Bos taurus GN=AGA PE=2 SV=1 - [Q1RMN0_BOVIN]                         | 6.40  | 2  | 2  | 2  | 0.811 | 1.903  | 1.092 |
| F1MLB8     | ATP synthase subunit alpha OS=Bos taurus GN=ATP5A1 PE=1 SV=1 - [F1MLB8_BOVIN]                   | 3.62  | 2  | 2  | 2  | 0.440 | 1.903  | 1.145 |
| Q8MJ16     | Attractin OS=Bos taurus GN=ATRN PE=2 SV=1 - [Q8MJ16_BOVIN]                                      | 24.10 | 31 | 32 | 58 | 0.758 | 2.075  | 1.219 |
| Q862Q3     | Beta-2-microglobulin (Fragment) OS=Bos taurus PE=2 SV=1 - [Q862Q3_BOVIN]                        | 79.57 | 7  | 7  | 12 | 0.847 | 2.132  | 1.055 |
| P02666     | Beta-casein OS=Bos taurus GN=CSN2 PE=1 SV=2 - [CASB_BOVIN]                                      | 15.18 | 3  | 3  | 4  | 0.911 | 9.058  | 0.701 |
| A6QQ07     | Biotinidase OS=Bos taurus GN=BTD PE=2 SV=1 - [BTD_BOVIN]                                        | 19.43 | 9  | 9  | 10 | 0.975 | 2.903  | 1.652 |
| A6QPP9     | C-X-C motif chemokine OS=Bos taurus GN=PF4 PE=2 SV=1 - [A6QPP9_BOVIN]                           | 40.68 | 6  | 6  | 17 | 0.605 | 1.538  | 1.035 |
| F1N619     | Cadherin-1 OS=Bos taurus GN=CDH1 PE=1 SV=2 - [F1N619_BOVIN]                                     | 1.57  | 2  | 2  | 2  | 0.825 | 1.840  | 1.122 |
| F1MKP6     | Cadherin-13 OS=Bos taurus GN=CDH13 PE=4 SV=2 - [F1MKP6_BOVIN]                                   | 16.59 | 9  | 9  | 10 | 1.022 | 2.007  | 0.954 |
| P19534     | Cadherin-2 (Fragment) OS=Bos taurus GN=CDH2 PE=2 SV=1 - [CADH2_BOVIN]                           | 4.56  | 2  | 2  | 2  | 0.615 | 1.475  | 1.520 |
| G5E588     | Cadherin-5 OS=Bos taurus GN=CDH5 PE=4 SV=1 - [G5E588_BOVIN]                                     | 6.14  | 4  | 4  | 5  | 0.704 | 3.226  | 1.262 |
| P62157     | Calmodulin OS=Bos taurus GN=CALM PE=1 SV=2 - [CALM_BOVIN]                                       | 18.79 | 3  | 3  | 3  | 1.714 | 2.567  | 1.761 |
| A5D7J6     | CALR protein OS=Bos taurus GN=CALR PE=1 SV=1 - [A5D7J6_BOVIN]                                   | 25.66 | 10 | 10 | 11 | 0.977 | 3.239  | 2.008 |
| F1N3H1     | Calumenin OS=Bos taurus GN=CALU PE=1 SV=1 - [F1N3H1_BOVIN]                                      | 12.70 | 2  | 2  | 2  | 1.246 | 13.400 | 7.715 |
| P00921     | Carbonic anhydrase 2 OS=Bos taurus GN=CA2 PE=1 SV=3 - [CAH2_BOVIN]                              | 20.77 | 4  | 4  | 4  | 0.803 | 2.350  | 1.126 |
| A0A140T835 | Carboxylic ester hydrolase OS=Bos taurus GN=ACHE PE=3 SV=1 - [A0A140T835_BOVIN]                 | 3.43  | 2  | 2  | 2  | 0.791 | 2.091  | 1.345 |
| Q2KIG3     | Carboxypeptidase B2 OS=Bos taurus GN=CPB2 PE=1 SV=1 - [CBPB2_BOVIN]                             | 5.44  | 2  | 2  | 2  | 0.395 | 1.437  | 0.917 |
| Q17QK3     | Carboxypeptidase Q OS=Bos taurus GN=CPQ PE=2 SV=1 - [CBPQ_BOVIN]                                | 22.88 | 10 | 10 | 12 | 0.758 | 1.942  | 1.251 |
| P19660     | Cathelicidin-2 OS=Bos taurus GN=CATHL2 PE=1 SV=2 - [CTHL2_BOVIN]                                | 14.20 | 2  | 2  | 3  | 0.791 | 1.778  | 1.115 |
| P07688     | Cathepsin B OS=Bos taurus GN=CTSB PE=1 SV=5 - [CATB_BOVIN]                                      | 23.28 | 6  | 6  | 9  | 0.764 | 1.760  | 1.269 |
| Q864S1     | Cathepsin C (Fragment) OS=Bos taurus PE=2 SV=1 - [Q864S1_BOVIN]                                 | 21.40 | 8  | 8  | 9  | 0.668 | 1.837  | 1.013 |
| P25326     | Cathepsin S OS=Bos taurus GN=CTSS PE=1 SV=2 - [CATS_BOVIN]                                      | 11.18 | 3  | 3  | 3  | 0.821 | 3.289  | 1.620 |
| F1MW68     | Cathepsin Z OS=Bos taurus GN=CTSZ PE=3 SV=1 - [F1MW68_BOVIN]                                    | 10.20 | 3  | 3  | 3  | 2.207 | 8.209  | 2.966 |
| P08169     | Cation-independent mannose-6-phosphate receptor OS=Bos taurus GN=IGF2R PE=1 SV=2 - [MPRI_BOVIN] | 10.80 | 27 | 27 | 30 | 0.695 | 2.383  | 1.340 |
| A5PJP4     | CBLN2 protein OS=Bos taurus GN=CBLN2 PE=2 SV=1 - [A5PJP4_BOVIN]                                 | 6.70  | 2  | 2  | 2  | 0.881 | 2.596  | 1.158 |
| F1MHN8     | CD166 antigen OS=Bos taurus GN=ALCAM PE=4 SV=2 - [F1MHN8_BOVIN]                                 | 10.63 | 5  | 5  | 5  | 0.804 | 1.791  | 1.050 |
| F1MHC3     | CD44 antigen OS=Bos taurus GN=CD44 PE=4 SV=1 - [F1MHC3_BOVIN]                                   | 10.11 | 4  | 4  | 11 | 0.848 | 1.552  | 1.038 |
| A7YW37     | CD58 protein (Fragment) OS=Bos taurus GN=CD58 PE=2 SV=1 - [A7YW37_BOVIN]                        | 16.15 | 4  | 4  | 4  | 0.822 | 1.928  | 1.153 |
| Q32PA1     | CD59 molecule, complement regulatory protein OS=Bos taurus GN=CD59 PE=2 SV=1 - [Q32PA1_BOVIN]   | 22.31 | 3  | 3  | 4  | 0.857 | 2.170  | 1.234 |
| A6QNW7     | CD5L protein OS=Bos taurus GN=CD5L PE=2 SV=1 - [A6QNW7_BOVIN]                                   | 39.91 | 18 | 18 | 47 | 0.753 | 1.752  | 1.067 |
| Q9GL33     | CD86 antigen (Fragment) OS=Bos taurus GN=CD86 PE=2 SV=1 - [Q9GL33_BOVIN]                        | 6.34  | 2  | 2  | 2  | 1.079 | 1.922  | 1.299 |
| Q2TBL2     | Cell adhesion molecule 1 OS=Bos taurus GN=CADM1 PE=2 SV=1 - [Q2TBL2_BOVIN]                      | 21.82 | 6  | 6  | 7  | 0.827 | 1.746  | 1.023 |
| P32749     | Cholinesterase OS=Bos taurus GN=BCHE PE=2 SV=2 - [CHLE_BOVIN]                                   | 11.79 | 9  | 9  | 13 | 0.744 | 2.253  | 1.215 |
| A0A140T879 | Chromogranin-A OS=Bos taurus GN=CHGA PE=1 SV=1 - [A0A140T879_BOVIN]                             | 6.24  | 2  | 2  | 2  | 1.009 | 1.342  | 0.915 |
| P17697     | Clusterin OS=Bos taurus GN=CLU PE=1 SV=1 - [CLUS_BOVIN]                                         | 22.10 | 10 | 10 | 15 | 0.741 | 1.843  | 1.123 |
| Q2HJ57     | Coactosin-like protein OS=Bos taurus GN=COTL1 PE=2 SV=3 - [COTL1_BOVIN]                         | 49.30 | 6  | 6  | 6  | 0.814 | 2.723  | 1.449 |



|            |                                                                                                             |       |    |    |     |              |               |              |
|------------|-------------------------------------------------------------------------------------------------------------|-------|----|----|-----|--------------|---------------|--------------|
| P00741     | Coagulation factor IX OS=Bos taurus GN=F9 PE=1 SV=2 - [FA9_BOVIN]                                           | 13.20 | 6  | 6  | 6   | 0.811        | 2.156         | 1.133        |
| Q28107     | Coagulation factor V OS=Bos taurus GN=F5 PE=1 SV=1 - [FA5_BOVIN]                                            | 3.08  | 6  | 6  | 7   | 0.925        | 1.836         | 1.088        |
| P02453     | Collagen alpha-1(I) chain OS=Bos taurus GN=COL1A1 PE=1 SV=3 - [CO1A1_BOVIN]                                 | 9.43  | 10 | 11 | 20  | 1.000        | 1.742         | 1.022        |
| F1MXS8     | Collagen alpha-1(III) chain OS=Bos taurus GN=COL3A1 PE=4 SV=2 - [F1MXS8_BOVIN]                              | 6.48  | 7  | 8  | 12  | 0.863        | 2.445         | 1.300        |
| F1N0K0     | Collagen alpha-1(XI) chain OS=Bos taurus GN=COL11A1 PE=4 SV=2 - [F1N0K0_BOVIN]                              | 2.31  | 2  | 5  | 5   | 1.176        | 3.753         | 2.027        |
| P02465     | Collagen alpha-2(I) chain OS=Bos taurus GN=COL1A2 PE=1 SV=2 - [CO1A2_BOVIN]                                 | 3.23  | 4  | 4  | 5   | <b>9.218</b> | <b>6.114</b>  | 1.000        |
| P42916     | Collectin-43 OS=Bos taurus GN=CL43 PE=1 SV=2 - [CL43_BOVIN]                                                 | 38.63 | 10 | 10 | 14  | 0.839        | 1.933         | 1.048        |
| Q0VCX1     | Complement C1s subcomponent OS=Bos taurus GN=C1S PE=2 SV=2 - [C1S_BOVIN]                                    | 4.93  | 3  | 3  | 4   | 0.913        | 1.683         | 1.000        |
| A0A0A0MP91 | Complement C2 OS=Bos taurus GN=C2 PE=3 SV=1 - [A0A0A0MP91_BOVIN]                                            | 23.33 | 18 | 18 | 36  | 0.726        | 2.269         | 1.285        |
| Q2UVX4     | Complement C3 OS=Bos taurus GN=C3 PE=1 SV=2 - [CO3_BOVIN]                                                   | 54.55 | 85 | 85 | 185 | 0.675        | <b>3.680</b>  | 1.576        |
| A5D9E9     | Complement component 1, r subcomponent OS=Bos taurus GN=C1R PE=2 SV=1 - [A5D9E9_BOVIN]                      | 3.83  | 3  | 3  | 3   | 0.900        | 1.565         | 1.264        |
| F1MM86     | Complement component C6 OS=Bos taurus GN=C6 PE=4 SV=1 - [F1MM86_BOVIN]                                      | 3.11  | 3  | 3  | 3   | 0.309        | 1.238         | 0.928        |
| F1N045     | Complement component C7 OS=Bos taurus GN=C7 PE=4 SV=1 - [F1N045_BOVIN]                                      | 4.86  | 4  | 4  | 4   | 0.559        | 1.871         | 1.289        |
| P81187     | Complement factor B OS=Bos taurus GN=CFB PE=1 SV=2 - [CFAB_BOVIN]                                           | 56.37 | 37 | 38 | 114 | 0.634        | <b>2.815</b>  | 1.278        |
| F1MVI0     | Contactin-1 OS=Bos taurus GN=CNTN1 PE=4 SV=1 - [F1MVI0_BOVIN]                                               | 5.30  | 5  | 5  | 5   | 0.760        | 1.900         | 1.166        |
| E1BF81     | Corticosteroid-binding globulin OS=Bos taurus GN=SERPINA6 PE=3 SV=1 - [CBG_BOVIN]                           | 32.18 | 12 | 12 | 25  | 0.748        | 1.930         | 1.144        |
| A6QP30     | CPN2 protein OS=Bos taurus GN=CPN2 PE=2 SV=1 - [A6QP30_BOVIN]                                               | 3.28  | 2  | 2  | 2   | 0.613        | 2.007         | 1.794        |
| B8Y9T0     | Cumulus cell-specific fibronectin 1 transcript variant OS=Bos taurus GN=FN1 PE=1 SV=1 - [B8Y9T0_BOVIN]      | 7.10  | 14 | 14 | 15  | 0.842        | 1.613         | 1.072        |
| Q1RMP3     | CutA divalent cation tolerance homolog (E. coli) OS=Bos taurus GN=CUTA PE=2 SV=1 - [Q1RMP3_BOVIN]           | 18.30 | 2  | 2  | 2   | 0.721        | 1.622         | 1.226        |
| P62894     | Cytochrome c OS=Bos taurus GN=CYCS PE=1 SV=2 - [CYC_BOVIN]                                                  | 56.19 | 6  | 6  | 9   | 0.916        | 1.734         | 1.198        |
| Q45VK8     | DAF-2 OS=Bos taurus GN=CD55 PE=2 SV=1 - [Q45VK8_BOVIN]                                                      | 6.27  | 2  | 2  | 2   | 0.772        | 1.976         | 1.322        |
| E1BIR2     | Dipeptidase OS=Bos taurus GN=DPEP2 PE=3 SV=1 - [E1BIR2_BOVIN]                                               | 5.58  | 3  | 3  | 3   | 0.721        | 2.383         | 1.686        |
| P81425     | Dipeptidyl peptidase 4 OS=Bos taurus GN=DPP4 PE=1 SV=3 - [DPP4_BOVIN]                                       | 24.58 | 17 | 17 | 19  | 0.717        | 2.157         | 1.162        |
| A6QL81     | DKK3 protein OS=Bos taurus GN=DKK3 PE=2 SV=1 - [A6QL81_BOVIN]                                               | 12.32 | 3  | 3  | 3   | 0.967        | 1.347         | 1.033        |
| A2VE41     | EGF-containing fibulin-like extracellular matrix protein 1 OS=Bos taurus GN=EFEMP1 PE=1 SV=1 - [A2VE41_BOV] | 14.86 | 6  | 6  | 8   | 0.869        | 1.212         | 1.000        |
| Q28105     | Endothelial protein C receptor OS=Bos taurus GN=PROCR PE=2 SV=1 - [EPCR_BOVIN]                              | 14.94 | 3  | 3  | 6   | 0.769        | 1.914         | 1.442        |
| Q3MHW2     | F10 protein (Fragment) OS=Bos taurus GN=F10 PE=2 SV=1 - [Q3MHW2_BOVIN]                                      | 12.63 | 6  | 6  | 6   | 0.920        | 2.538         | 1.676        |
| F1MHQ4     | Fatty acid-binding protein, adipocyte OS=Bos taurus GN=FABP4 PE=1 SV=2 - [F1MHQ4_BOVIN]                     | 14.39 | 2  | 2  | 2   | <b>8.713</b> | <b>24.442</b> | <b>9.778</b> |
| P80425     | Fatty acid-binding protein, liver OS=Bos taurus GN=FABP1 PE=1 SV=1 - [FABPL_BOVIN]                          | 14.17 | 2  | 2  | 4   | 0.726        | 1.867         | 1.260        |
| Q58D62     | Fetuin-B OS=Bos taurus GN=FETUB PE=1 SV=1 - [FETUB_BOVIN]                                                   | 54.26 | 21 | 21 | 96  | 0.953        | <b>3.517</b>  | 1.520        |
| A5PJE3     | Fibrinogen alpha chain OS=Bos taurus GN=FGA PE=1 SV=1 - [A5PJE3_BOVIN]                                      | 19.19 | 10 | 10 | 15  | 0.575        | 1.328         | 0.914        |
| A4IFL5     | Fibroblast growth factor receptor OS=Bos taurus GN=FGFR1 PE=2 SV=2 - [A4IFL5_BOVIN]                         | 3.05  | 2  | 2  | 3   | 0.843        | 1.000         | 1.023        |
| Q29RY7     | Fibroleukin OS=Bos taurus GN=FGL2 PE=2 SV=1 - [FGL2_BOVIN]                                                  | 14.74 | 8  | 8  | 12  | 0.949        | 2.192         | 1.175        |
| A5D7S8     | Fibulin-1 OS=Bos taurus GN=FBLN1 PE=2 SV=1 - [A5D7S8_BOVIN]                                                 | 8.22  | 6  | 6  | 7   | 0.723        | 1.182         | 0.935        |
| P02702     | Folate receptor alpha OS=Bos taurus GN=FOLR1 PE=1 SV=3 - [FOLR1_BOVIN]                                      | 16.60 | 4  | 4  | 4   | 0.903        | 2.377         | 1.040        |
| Q58D84     | Follistatin-related protein 1 OS=Bos taurus GN=FSTL1 PE=2 SV=1 - [FSTL1_BOVIN]                              | 17.26 | 6  | 6  | 7   | <b>2.697</b> | <b>8.102</b>  | <b>3.193</b> |
| A7E3W2     | Galectin-3-binding protein OS=Bos taurus GN=LGALS3BP PE=1 SV=1 - [LG3BP_BOVIN]                              | 19.64 | 9  | 9  | 15  | 0.613        | 1.809         | 1.131        |
| A6H7H5     | Gamma-tubulin complex component OS=Bos taurus GN=TUBGCP5 PE=2 SV=1 - [A6H7H5_BOVIN]                         | 2.25  | 2  | 2  | 2   | 2.035        | 1.866         | 1.059        |

|            |                                                                                                            |       |    |    |     |              |               |              |
|------------|------------------------------------------------------------------------------------------------------------|-------|----|----|-----|--------------|---------------|--------------|
| F1MJH1     | Gelsolin OS=Bos taurus GN=GSN PE=1 SV=1 - [F1MJH1_BOVIN]                                                   | 7.39  | 5  | 5  | 6   | 0.661        | 2.073         | 1.105        |
| Q3ZBD7     | Glucose-6-phosphate isomerase OS=Bos taurus GN=GPI PE=2 SV=4 - [G6PI_BOVIN]                                | 23.16 | 11 | 11 | 12  | 0.737        | 2.393         | 1.178        |
| F1MEM5     | Glutamyl aminopeptidase OS=Bos taurus GN=ENPEP PE=4 SV=1 - [F1MEM5_BOVIN]                                  | 3.97  | 4  | 4  | 4   | 1.100        | 2.204         | 1.214        |
| G3X8D7     | Glutathione peroxidase OS=Bos taurus GN=GPX3 PE=3 SV=1 - [G3X8D7_BOVIN]                                    | 8.48  | 2  | 2  | 3   | 0.303        | 0.526         | 0.380        |
| P02081     | Hemoglobin fetal subunit beta OS=Bos taurus PE=1 SV=1 - [HBBF_BOVIN]                                       | 71.03 | 7  | 10 | 14  | 0.608        | 1.908         | 1.199        |
| P01966     | Hemoglobin subunit alpha OS=Bos taurus GN=HBA PE=1 SV=2 - [HBA_BOVIN]                                      | 81.69 | 8  | 8  | 17  | 0.609        | 1.550         | 0.894        |
| P02070     | Hemoglobin subunit beta OS=Bos taurus GN=HBB PE=1 SV=1 - [HBB_BOVIN]                                       | 75.86 | 8  | 11 | 26  | 0.629        | 1.404         | 0.900        |
| Q3SZV7     | Hemopexin OS=Bos taurus GN=HPX PE=2 SV=1 - [HEMO_BOVIN]                                                    | 64.49 | 29 | 29 | 270 | 0.906        | <b>2.886</b>  | 1.382        |
| Q3SYR8     | Immunoglobulin J chain OS=Bos taurus GN=IGJ PE=1 SV=1 - [Q3SYR8_BOVIN]                                     | 33.76 | 5  | 5  | 10  | 0.855        | 1.642         | 1.119        |
| I7CLV3     | Insulin (Fragment) OS=Bos taurus PE=2 SV=1 - [I7CLV3_BOVIN]                                                | 35.80 | 2  | 2  | 11  | 0.736        | 1.557         | 1.075        |
| P53712     | Integrin beta-1 OS=Bos taurus GN=ITGB1 PE=1 SV=3 - [ITB1_BOVIN]                                            | 3.38  | 3  | 3  | 4   | 0.727        | 2.467         | 1.415        |
| F1MMP5     | Inter-alpha-trypsin inhibitor heavy chain H1 OS=Bos taurus GN=ITIH1 PE=4 SV=1 - [F1MMP5_BOVIN]             | 3.31  | 2  | 2  | 2   | 0.502        | 2.609         | 0.828        |
| P56652     | Inter-alpha-trypsin inhibitor heavy chain H3 OS=Bos taurus GN=ITIH3 PE=1 SV=2 - [ITIH3_BOVIN]              | 5.05  | 5  | 5  | 5   | 0.785        | 2.741         | 1.800        |
| F1MMD7     | Inter-alpha-trypsin inhibitor heavy chain H4 OS=Bos taurus GN=ITIH4 PE=1 SV=2 - [F1MMD7_BOVIN]             | 21.83 | 17 | 17 | 23  | 0.777        | 3.143         | 1.788        |
| F1MI38     | Intercellular adhesion molecule 1 OS=Bos taurus GN=ICAM1 PE=4 SV=1 - [F1MI38_BOVIN]                        | 9.53  | 5  | 5  | 7   | 0.876        | 2.301         | 1.288        |
| Q0VC51     | Interleukin 1 receptor accessory protein OS=Bos taurus GN=IL1RAP PE=2 SV=1 - [Q0VC51_BOVIN]                | 38.06 | 14 | 14 | 24  | 1.269        | 2.967         | 1.510        |
| A5D7R6     | ITIH2 protein OS=Bos taurus GN=ITIH2 PE=2 SV=1 - [A5D7R6_BOVIN]                                            | 6.87  | 8  | 8  | 9   | 0.692        | 2.113         | 1.249        |
| F1MNV5     | Kininogen-1 OS=Bos taurus GN=KNG1 PE=1 SV=2 - [F1MNV5_BOVIN]                                               | 68.35 | 10 | 32 | 110 | 0.813        | <b>3.385</b>  | 1.435        |
| P01045     | Kininogen-2 OS=Bos taurus GN=KNG2 PE=1 SV=1 - [KNG2_BOVIN]                                                 | 47.33 | 9  | 31 | 114 | 0.886        | <b>2.522</b>  | 1.429        |
| B0JYN3     | L-lactate dehydrogenase OS=Bos taurus GN=LDHB PE=2 SV=1 - [B0JYN3_BOVIN]                                   | 6.89  | 2  | 2  | 2   | 0.630        | 1.572         | 0.756        |
| Q2KIW4     | Lecithin-cholesterol acyltransferase OS=Bos taurus GN=LCAT PE=2 SV=1 - [Q2KIW4_BOVIN]                      | 7.50  | 3  | 3  | 3   | 0.647        | 2.380         | 1.960        |
| A0A140T8D4 | Legumain OS=Bos taurus GN=LGMN PE=4 SV=1 - [A0A140T8D4_BOVIN]                                              | 22.86 | 10 | 10 | 13  | 0.645        | 2.574         | 1.203        |
| Q2KIF2     | Leucine-rich alpha-2-glycoprotein 1 OS=Bos taurus GN=LRG1 PE=2 SV=1 - [Q2KIF2_BOVIN]                       | 50.58 | 18 | 18 | 77  | 0.845        | 2.221         | 1.325        |
| A7Z077     | LOC510651 protein OS=Bos taurus GN=LOC510651 PE=2 SV=1 - [A7Z077_BOVIN]                                    | 0.90  | 2  | 2  | 2   | 0.662        | 1.985         | 0.800        |
| Q05443     | Lumican OS=Bos taurus GN=LUM PE=1 SV=1 - [LUM_BOVIN]                                                       | 46.49 | 12 | 12 | 31  | 0.894        | 2.560         | 1.628        |
| Q05204     | Lysosome-associated membrane glycoprotein 1 OS=Bos taurus GN=LAMP1 PE=1 SV=2 - [LAMP1_BOVIN]               | 9.05  | 4  | 4  | 8   | 0.828        | 1.735         | 1.115        |
| B5B0D4     | Major allergen beta-lactoglobulin OS=Bos taurus PE=2 SV=1 - [B5B0D4_BOVIN]                                 | 16.29 | 2  | 2  | 2   | 1.185        | 1.541         | 1.035        |
| Q1JP81     | Major histocompatibility complex, class II, DR beta 4 OS=Bos taurus GN=HLA-DRB4 PE=2 SV=1 - [Q1JP81_BOVIN] | 7.89  | 2  | 2  | 2   | 0.770        | 1.681         | 0.977        |
| P43481     | Mast/stem cell growth factor receptor Kit OS=Bos taurus GN=KIT PE=2 SV=1 - [KIT_BOVIN]                     | 2.35  | 3  | 3  | 3   | 0.642        | 2.187         | 1.237        |
| Q9GMB4     | Membrane tyrosine phosphatase (Fragment) OS=Bos taurus GN=cd45 PE=2 SV=1 - [Q9GMB4_BOVIN]                  | 3.25  | 2  | 2  | 2   | 0.812        | 1.741         | 1.288        |
| Q6GVI3     | MHC class II antigen (Fragment) OS=Bos taurus GN=BoLA-DRA PE=4 SV=1 - [Q6GVI3_BOVIN]                       | 29.00 | 2  | 2  | 2   | 0.829        | 1.746         | 1.099        |
| P02192     | Myoglobin OS=Bos taurus GN=MB PE=1 SV=3 - [MYG_BOVIN]                                                      | 20.13 | 3  | 3  | 3   | 0.573        | 1.426         | 0.920        |
| Q9BE40     | Myosin-1 OS=Bos taurus GN=MYH1 PE=2 SV=2 - [MYH1_BOVIN]                                                    | 1.29  | 3  | 3  | 3   | 0.797        | 3.044         | 0.847        |
| Q95KW3     | NAD(P)(+)-arginine ADP-ribosyltransferase (Fragment) OS=Bos taurus GN=ART3 PE=2 SV=1 - [Q95KW3_BOVIN]      | 8.26  | 2  | 2  | 2   | 0.608        | 2.035         | 1.449        |
| F1N1W7     | Neural cell adhesion molecule 1 OS=Bos taurus GN=NCAM1 PE=4 SV=2 - [F1N1W7_BOVIN]                          | 10.91 | 7  | 7  | 11  | 0.755        | 2.772         | 1.376        |
| Q0P569     | Nucleobindin-1 OS=Bos taurus GN=NUCB1 PE=2 SV=1 - [NUCB1_BOVIN]                                            | 27.43 | 11 | 11 | 14  | <b>4.032</b> | <b>16.142</b> | <b>4.954</b> |
| Q17QF1     | Oncostatin M receptor OS=Bos taurus GN=OSMR PE=2 SV=1 - [Q17QF1_BOVIN]                                     | 33.02 | 2  | 9  | 17  | 0.830        | 1.669         | 1.148        |
| G3X6Y4     | Osteomodulin OS=Bos taurus GN=OMD PE=4 SV=1 - [G3X6Y4_BOVIN]                                               | 15.88 | 6  | 6  | 9   | 0.914        | 2.020         | 1.308        |

|            |                                                                                                       |       |    |     |      |              |              |              |
|------------|-------------------------------------------------------------------------------------------------------|-------|----|-----|------|--------------|--------------|--------------|
| Q2QCT5     | Osteopontin (Fragment) OS=Bos taurus PE=2 SV=1 - [Q2QCT5_BOVIN]                                       | 16.09 | 5  | 5   | 5    | 0.835        | 1.562        | 0.978        |
| C4T8B4     | Pentaxin OS=Bos taurus GN=CRP PE=2 SV=1 - [C4T8B4_BOVIN]                                              | 8.93  | 2  | 2   | 2    | 0.858        | 2.259        | 1.358        |
| Q58D34     | Peptidase inhibitor 16 OS=Bos taurus GN=PI16 PE=2 SV=1 - [PI16_BOVIN]                                 | 8.19  | 3  | 3   | 5    | 0.775        | 2.419        | 1.129        |
| P80109     | Phosphatidylinositol-glycan-specific phospholipase D OS=Bos taurus GN=GPLD1 PE=1 SV=1 - [PHLD_BOVIN]  | 2.62  | 2  | 2   | 2    | 0.844        | 3.654        | 1.453        |
| F1MDS0     | Phospholipid phosphatase-related protein type 2 OS=Bos taurus GN=PRG4 PE=4 SV=2 - [F1MDS0_BOVIN]      | 27.67 | 20 | 20  | 47   | 0.840        | 1.699        | 1.026        |
| F1MX49     | Platelet-derived growth factor receptor alpha OS=Bos taurus GN=PDGFRA PE=3 SV=2 - [F1MX49_BOVIN]      | 2.02  | 2  | 2   | 2    | <b>2.894</b> | <b>2.600</b> | 1.814        |
| P21782     | Pleiotrophin OS=Bos taurus GN=PTN PE=1 SV=2 - [PTN_BOVIN]                                             | 9.52  | 2  | 2   | 2    | <b>2.918</b> | <b>8.592</b> | <b>2.889</b> |
| A7E350     | PLG protein OS=Bos taurus GN=PLG PE=2 SV=1 - [A7E350_BOVIN]                                           | 15.47 | 11 | 11  | 21   | 0.658        | 1.353        | 0.912        |
| Q8I019     | Poliovirus receptor related-gene 1 (Fragment) OS=Bos taurus GN=prr1 PE=4 SV=1 - [Q8I019_BOVIN]        | 22.45 | 2  | 2   | 2    | 0.869        | 3.661        | 1.276        |
| A9UIB1     | PON1 OS=Bos taurus GN=PON1 PE=2 SV=1 - [A9UIB1_BOVIN]                                                 | 7.61  | 3  | 3   | 4    | 1.100        | 1.818        | 1.401        |
| Q29437     | Primary amine oxidase, liver isozyme OS=Bos taurus PE=1 SV=1 - [AOCX_BOVIN]                           | 49.74 | 16 | 27  | 194  | 0.707        | <b>2.052</b> | 1.214        |
| A5D7B7     | Prolyl endopeptidase FAP OS=Bos taurus GN=FAP PE=1 SV=1 - [SEPR_BOVIN]                                | 2.37  | 2  | 2   | 2    | 0.842        | 2.720        | 1.136        |
| A1L555     | Prosaposin OS=Bos taurus GN=PSAP PE=2 SV=1 - [A1L555_BOVIN]                                           | 6.67  | 4  | 4   | 5    | 1.077        | 2.651        | 1.757        |
| G5E5C3     | Proteasome subunit alpha type OS=Bos taurus GN=PSMA6 PE=3 SV=1 - [G5E5C3_BOVIN]                       | 9.39  | 2  | 2   | 2    | 1.512        | 2.245        | 2.740        |
| Q58DU5     | Proteasome subunit alpha type-3 OS=Bos taurus GN=PSMA3 PE=1 SV=3 - [PSA3_BOVIN]                       | 8.63  | 2  | 2   | 2    | 0.853        | 1.916        | 1.262        |
| F1MMK9     | Protein AMBP OS=Bos taurus GN=AMBP PE=4 SV=2 - [F1MMK9_BOVIN]                                         | 41.48 | 14 | 14  | 34   | 1.324        | 3.827        | 1.605        |
| Q5E946     | Protein deglycase DJ-1 OS=Bos taurus GN=PARK7 PE=2 SV=1 - [PARK7_BOVIN]                               | 26.98 | 4  | 4   | 4    | 0.608        | 1.799        | 1.071        |
| A6H7J6     | Protein disulfide-isomerase OS=Bos taurus GN=P4HB PE=1 SV=1 - [A6H7J6_BOVIN]                          | 13.53 | 7  | 7   | 7    | 0.944        | 2.527        | 1.500        |
| A5D7E8     | Protein disulfide-isomerase OS=Bos taurus GN=PDIA3 PE=1 SV=1 - [A5D7E8_BOVIN]                         | 6.34  | 3  | 3   | 3    | 0.616        | 4.341        | 1.511        |
| Q2KIT0     | Protein HP-20 homolog OS=Bos taurus PE=2 SV=1 - [HP20_BOVIN]                                          | 54.97 | 11 | 11  | 48   | 0.691        | 2.684        | 1.244        |
| Q2KIX7     | Protein HP-25 homolog 1 OS=Bos taurus PE=1 SV=1 - [HP251_BOVIN]                                       | 30.66 | 6  | 7   | 24   | 0.810        | 2.465        | 1.107        |
| Q2KIU3     | Protein HP-25 homolog 2 OS=Bos taurus PE=2 SV=1 - [HP252_BOVIN]                                       | 43.72 | 8  | 9   | 34   | 0.778        | 2.348        | 1.146        |
| P35466     | Protein S100-A4 OS=Bos taurus GN=S100A4 PE=1 SV=2 - [S10A4_BOVIN]                                     | 15.84 | 2  | 2   | 2    | 1.188        | 2.666        | 1.572        |
| P00735     | Prothrombin OS=Bos taurus GN=F2 PE=1 SV=2 - [THRB_BOVIN]                                              | 37.60 | 22 | 22  | 102  | 0.936        | 1.883        | 1.078        |
| A5D7Q2     | Putative uncharacterized protein OS=Bos taurus PE=2 SV=1 - [A5D7Q2_BOVIN]                             | 6.16  | 2  | 2   | 2    | 1.005        | 2.468        | 1.145        |
| A5PK72     | Putative uncharacterized protein OS=Bos taurus PE=2 SV=1 - [A5PK72_BOVIN]                             | 42.80 | 2  | 9   | 27   | 0.553        | 1.331        | 0.813        |
| A6QM09     | Putative uncharacterized protein OS=Bos taurus PE=2 SV=1 - [A6QM09_BOVIN]                             | 59.48 | 5  | 12  | 29   | 0.782        | 2.026        | 1.023        |
| E0AE18     | Receptor protein-tyrosine kinase OS=Bos taurus GN=EGFR PE=2 SV=1 - [E0AE18_BOVIN]                     | 6.75  | 5  | 6   | 7    | 0.750        | 1.154        | 1.342        |
| Q9TTJ5     | Regucalcin OS=Bos taurus GN=RGN PE=2 SV=1 - [RGN_BOVIN]                                               | 23.08 | 6  | 6   | 6    | 0.413        | 1.355        | 0.864        |
| Q2KJ39     | Reticulocalbin-3 OS=Bos taurus GN=RCN3 PE=2 SV=1 - [RCN3_BOVIN]                                       | 8.84  | 2  | 2   | 2    | 0.829        | 1.703        | 1.077        |
| P18902     | Retinol-binding protein 4 OS=Bos taurus GN=RBP4 PE=1 SV=1 - [RET4_BOVIN]                              | 37.70 | 6  | 6   | 12   | 0.445        | 2.255        | 0.893        |
| P85521     | Scavenger receptor cysteine-rich type 1 protein M130 OS=Bos taurus GN=CD163 PE=1 SV=2 - [C163A_BOVIN] | 8.15  | 9  | 9   | 9    | 0.768        | 2.237        | 1.495        |
| G3X6N3     | Serotransferrin OS=Bos taurus GN=TF PE=1 SV=1 - [G3X6N3_BOVIN]                                        | 93.75 | 8  | 104 | 4606 | 0.654        | <b>2.063</b> | 1.163        |
| Q29443     | Serotransferrin OS=Bos taurus GN=TF PE=2 SV=1 - [TRFE_BOVIN]                                          | 93.75 | 8  | 104 | 4634 | 0.678        | <b>2.018</b> | 1.038        |
| Q2HJF0     | Serotransferrin-like OS=Bos taurus GN=LOC525947 PE=2 SV=1 - [Q2HJF0_BOVIN]                            | 36.98 | 14 | 18  | 167  | 0.724        | <b>4.100</b> | 1.305        |
| Q9TTE1     | Serpin A3-1 OS=Bos taurus GN=SERPINA3-1 PE=1 SV=3 - [SPA31_BOVIN]                                     | 74.21 | 2  | 27  | 667  | 0.947        | 1.429        | 1.000        |
| A0A0A0MP89 | Serpin A3-8 OS=Bos taurus GN=SERPINA3-8 PE=3 SV=1 - [A0A0A0MP89_BOVIN]                                | 53.11 | 17 | 22  | 289  | 0.787        | <b>2.061</b> | 1.174        |
| Q3SYR0     | Serpin peptidase inhibitor, clade A member 7 OS=Bos taurus GN=SERPINA7 PE=2 SV=1 - [Q3SYR0_BOVIN]     | 46.23 | 21 | 21  | 72   | 0.713        | 2.234        | 1.287        |

|            |                                                                                                         |       |    |    |      |              |              |              |
|------------|---------------------------------------------------------------------------------------------------------|-------|----|----|------|--------------|--------------|--------------|
| A5PJ69     | SERPINA10 protein OS=Bos taurus GN=SERPINA10 PE=2 SV=1 - [A5PJ69_BOVIN]                                 | 5.97  | 3  | 3  | 3    | 0.673        | 2.348        | 1.174        |
| A6QPW6     | SERPINI2 protein OS=Bos taurus GN=SERPINI2 PE=2 SV=1 - [A6QPW6_BOVIN]                                   | 7.65  | 3  | 3  | 4    | 0.877        | 2.899        | 1.574        |
| A0A140T897 | Serum albumin OS=Bos taurus GN=ALB PE=1 SV=1 - [A0A140T897_BOVIN]                                       | 93.57 | 11 | 92 | 1717 | 0.704        | <b>3.086</b> | 1.272        |
| E1BJF9     | Serum amyloid A protein OS=Bos taurus GN=LOC104968478 PE=3 SV=1 - [E1BJF9_BOVIN]                        | 29.23 | 4  | 4  | 4    | 0.537        | 1.084        | 0.545        |
| Q3T004     | Serum amyloid P-component OS=Bos taurus GN=APCS PE=2 SV=1 - [SAMP_BOVIN]                                | 36.61 | 8  | 8  | 11   | 0.700        | 2.648        | 1.253        |
| Q6T182     | Sex hormone-binding globulin (Fragment) OS=Bos taurus GN=SHBG PE=2 SV=1 - [Q6T182_BOVIN]                | 11.32 | 4  | 4  | 6    | 0.675        | 1.766        | 2.136        |
| Q3ZCL8     | SH3 domain-binding glutamic acid-rich-like protein 3 OS=Bos taurus GN=SH3BGL3 PE=3 SV=1 - [SH3L3_BOVIN] | 34.41 | 3  | 3  | 5    | 0.673        | 1.330        | 1.030        |
| A6QQN6     | SMPDL3B protein OS=Bos taurus GN=SMPDL3B PE=2 SV=1 - [A6QQN6_BOVIN]                                     | 9.43  | 4  | 4  | 4    | 0.602        | 2.432        | 1.243        |
| P13213     | SPARC OS=Bos taurus GN=SPARC PE=1 SV=2 - [SPRC_BOVIN]                                                   | 40.59 | 15 | 15 | 25   | <b>3.167</b> | <b>8.240</b> | <b>3.885</b> |
| Q3SYW7     | SPARC-like 1 (Hevin) OS=Bos taurus GN=SPARCL1 PE=2 SV=1 - [Q3SYW7_BOVIN]                                | 6.42  | 3  | 3  | 3    | 0.909        | 1.773        | 1.206        |
| Q3ZCH0     | Stress-70 protein, mitochondrial OS=Bos taurus GN=HSPA9 PE=2 SV=1 - [GRP75_BOVIN]                       | 2.80  | 2  | 2  | 2    | 0.714        | 2.060        | 1.345        |
| A3KLR9     | Superoxide dismutase [Cu-Zn] OS=Bos taurus GN=ECSOD PE=1 SV=1 - [A3KLR9_BOVIN]                          | 16.60 | 3  | 3  | 3    | 0.868        | 1.268        | 0.984        |
| P00442     | Superoxide dismutase [Cu-Zn] OS=Bos taurus GN=SOD1 PE=1 SV=2 - [SODC_BOVIN]                             | 37.50 | 6  | 6  | 8    | 0.814        | 1.710        | 1.040        |
| Q2KIS7     | Tetranectin OS=Bos taurus GN=CLEC3B PE=2 SV=1 - [TETN_BOVIN]                                            | 29.70 | 4  | 4  | 6    | 0.984        | 3.174        | 1.928        |
| A6QQ20     | TGOLN2 protein (Fragment) OS=Bos taurus GN=TGOLN2 PE=1 SV=1 - [A6QQ20_BOVIN]                            | 20.00 | 4  | 4  | 5    | 0.985        | 1.577        | 1.023        |
| F1N3A1     | Thrombospondin-1 OS=Bos taurus GN=THBS1 PE=4 SV=1 - [F1N3A1_BOVIN]                                      | 1.71  | 2  | 2  | 2    | 0.369        | 1.821        | 0.572        |
| G5E5C8     | Transaldolase OS=Bos taurus GN=TALDO1 PE=1 SV=1 - [G5E5C8_BOVIN]                                        | 9.50  | 3  | 3  | 3    | 0.716        | 1.750        | 1.070        |
| O46375     | Transthyretin OS=Bos taurus GN=TTR PE=1 SV=1 - [TTHY_BOVIN]                                             | 75.51 | 12 | 12 | 111  | 1.041        | 1.839        | 1.012        |
| E1B8N4     | Trehalase OS=Bos taurus GN=TREH PE=3 SV=2 - [E1B8N4_BOVIN]                                              | 18.65 | 8  | 8  | 10   | 0.707        | 1.879        | 1.202        |
| Q5E956     | Triosephosphate isomerase OS=Bos taurus GN=TPI1 PE=2 SV=3 - [TPIS_BOVIN]                                | 44.58 | 10 | 10 | 15   | 0.603        | 1.476        | 0.858        |
| Q0VD44     | Twisted gastrulation homolog 1 (Drosophila) OS=Bos taurus GN=TWSG1 PE=2 SV=1 - [Q0VD44_BOVIN]           | 8.52  | 2  | 2  | 2    | 1.145        | 4.876        | 1.285        |
| G3MYZ3     | Uncharacterized protein OS=Bos taurus GN=AFM PE=4 SV=1 - [G3MYZ3_BOVIN]                                 | 53.15 | 33 | 33 | 62   | 0.756        | 2.315        | 1.296        |
| E1BL29     | Uncharacterized protein OS=Bos taurus GN=BLMH PE=4 SV=1 - [E1BL29_BOVIN]                                | 19.17 | 7  | 7  | 8    | 0.702        | 2.137        | 1.267        |
| F1N7F9     | Uncharacterized protein OS=Bos taurus GN=CACNA2D1 PE=4 SV=2 - [F1N7F9_BOVIN]                            | 17.68 | 15 | 15 | 16   | 0.714        | 2.120        | 1.207        |
| F1MPE1     | Uncharacterized protein OS=Bos taurus GN=CD109 PE=4 SV=2 - [F1MPE1_BOVIN]                               | 18.59 | 22 | 22 | 29   | 0.780        | 2.187        | 1.296        |
| F1MN25     | Uncharacterized protein OS=Bos taurus GN=CD34 PE=4 SV=1 - [F1MN25_BOVIN]                                | 4.19  | 2  | 2  | 2    | 0.611        | 2.804        | 1.145        |
| G3N251     | Uncharacterized protein OS=Bos taurus GN=CENPE PE=3 SV=1 - [G3N251_BOVIN]                               | 0.84  | 2  | 2  | 2    | 0.608        | 2.420        | 1.113        |
| F1N4M7     | Uncharacterized protein OS=Bos taurus GN=CFI PE=1 SV=2 - [F1N4M7_BOVIN]                                 | 4.69  | 3  | 3  | 3    | 0.814        | 1.879        | 1.215        |
| F1MW33     | Uncharacterized protein OS=Bos taurus GN=CHL1 PE=4 SV=2 - [F1MW33_BOVIN]                                | 7.17  | 7  | 8  | 8    | 0.690        | 2.024        | 1.204        |
| G5E5W4     | Uncharacterized protein OS=Bos taurus GN=CNTNAP4 PE=4 SV=1 - [G5E5W4_BOVIN]                             | 4.11  | 2  | 2  | 2    | 1.000        | 1.000        | 1.000        |
| G3MZI7     | Uncharacterized protein OS=Bos taurus GN=COL5A1 PE=4 SV=1 - [G3MZI7_BOVIN]                              | 3.51  | 4  | 5  | 5    | 0.692        | 2.381        | 1.118        |
| E1BI98     | Uncharacterized protein OS=Bos taurus GN=COL6A1 PE=1 SV=1 - [E1BI98_BOVIN]                              | 5.55  | 6  | 6  | 7    | 0.665        | 2.209        | 1.254        |
| E1BB91     | Uncharacterized protein OS=Bos taurus GN=COL6A3 PE=1 SV=1 - [E1BB91_BOVIN]                              | 1.89  | 5  | 5  | 5    | 0.873        | 1.777        | 1.433        |
| F1N076     | Uncharacterized protein OS=Bos taurus GN=CP PE=1 SV=2 - [F1N076_BOVIN]                                  | 35.21 | 36 | 36 | 95   | 0.686        | <b>2.247</b> | 1.242        |
| F1ML89     | Uncharacterized protein OS=Bos taurus GN=CPS1 PE=1 SV=2 - [F1ML89_BOVIN]                                | 1.13  | 2  | 2  | 2    | 0.741        | 2.192        | 1.351        |
| F6R3I5     | Uncharacterized protein OS=Bos taurus GN=CRISP3 PE=3 SV=1 - [F6R3I5_BOVIN]                              | 30.17 | 8  | 8  | 15   | 0.637        | 2.131        | 1.110        |
| F1MRU4     | Uncharacterized protein OS=Bos taurus GN=DNAH3 PE=4 SV=2 - [F1MRU4_BOVIN]                               | 0.93  | 2  | 2  | 2    | 0.549        | 1.714        | 1.126        |
| E1BFN6     | Uncharacterized protein OS=Bos taurus GN=DPYS PE=1 SV=2 - [E1BFN6_BOVIN]                                | 29.46 | 14 | 14 | 14   | 0.854        | 2.591        | 1.429        |

|            |                                                                                   |       |    |    |     |       |              |       |
|------------|-----------------------------------------------------------------------------------|-------|----|----|-----|-------|--------------|-------|
| E1BKT9     | Uncharacterized protein OS=Bos taurus GN=DSP PE=1 SV=1 - [E1BKT9_BOVIN]           | 1.80  | 6  | 6  | 6   | 0.306 | 1.053        | 1.031 |
| G3MZJ0     | Uncharacterized protein OS=Bos taurus GN=EIF4EBP3 PE=4 SV=1 - [G3MZJ0_BOVIN]      | 0.28  | 2  | 2  | 2   | 0.501 | 1.583        | 1.117 |
| F1N6Y7     | Uncharacterized protein OS=Bos taurus GN=EIF5B PE=4 SV=2 - [F1N6Y7_BOVIN]         | 1.23  | 2  | 2  | 2   | 0.538 | 1.421        | 0.997 |
| F1MHP5     | Uncharacterized protein OS=Bos taurus GN=FLT4 PE=3 SV=2 - [F1MHP5_BOVIN]          | 1.77  | 2  | 2  | 3   | 0.771 | 3.404        | 1.555 |
| E1BLA8     | Uncharacterized protein OS=Bos taurus GN=GOLM1 PE=4 SV=1 - [E1BLA8_BOVIN]         | 15.06 | 6  | 6  | 8   | 0.817 | 1.934        | 1.179 |
| E1BB32     | Uncharacterized protein OS=Bos taurus GN=GP1BA PE=4 SV=2 - [E1BB32_BOVIN]         | 15.69 | 9  | 9  | 16  | 0.749 | 2.012        | 1.112 |
| F1N726     | Uncharacterized protein OS=Bos taurus GN=GP2 PE=4 SV=1 - [F1N726_BOVIN]           | 13.67 | 8  | 8  | 8   | 0.711 | 1.944        | 1.179 |
| F1MXE0     | Uncharacterized protein OS=Bos taurus GN=HEG1 PE=4 SV=2 - [F1MXE0_BOVIN]          | 3.19  | 4  | 4  | 4   | 0.891 | 1.817        | 0.966 |
| F1MI25     | Uncharacterized protein OS=Bos taurus GN=HIVEP1 PE=4 SV=2 - [F1MI25_BOVIN]        | 0.45  | 2  | 2  | 2   | 0.805 | 1.081        | 1.204 |
| F1MER7     | Uncharacterized protein OS=Bos taurus GN=HSPG2 PE=4 SV=1 - [F1MER7_BOVIN]         | 0.69  | 3  | 3  | 3   | 0.900 | 3.122        | 1.160 |
| E1BCU8     | Uncharacterized protein OS=Bos taurus GN=ICOSLG PE=4 SV=1 - [E1BCU8_BOVIN]        | 6.56  | 2  | 2  | 3   | 0.484 | 1.781        | 0.904 |
| G3N342     | Uncharacterized protein OS=Bos taurus GN=IGHE PE=4 SV=1 - [G3N342_BOVIN]          | 9.62  | 5  | 5  | 5   | 0.666 | 1.923        | 1.030 |
| G3N2D7     | Uncharacterized protein OS=Bos taurus GN=IGLL1 PE=4 SV=1 - [G3N2D7_BOVIN]         | 51.72 | 3  | 3  | 6   | 0.850 | 1.538        | 1.060 |
| F1MXJ6     | Uncharacterized protein OS=Bos taurus GN=KALRN PE=4 SV=2 - [F1MXJ6_BOVIN]         | 1.19  | 2  | 2  | 2   | 0.650 | 2.430        | 1.410 |
| G3N0V2     | Uncharacterized protein OS=Bos taurus GN=KRT1 PE=1 SV=1 - [G3N0V2_BOVIN]          | 11.06 | 4  | 9  | 18  | 0.496 | 1.140        | 1.124 |
| E1B991     | Uncharacterized protein OS=Bos taurus GN=KRT2 PE=1 SV=2 - [E1B991_BOVIN]          | 8.75  | 2  | 7  | 9   | 0.832 | 1.307        | 1.157 |
| F1MUY2     | Uncharacterized protein OS=Bos taurus GN=KRT6B PE=3 SV=1 - [F1MUY2_BOVIN]         | 37.30 | 3  | 23 | 33  | 0.352 | 1.669        | 1.057 |
| G3MXJ5     | Uncharacterized protein OS=Bos taurus GN=LAMP2 PE=1 SV=1 - [G3MXJ5_BOVIN]         | 7.13  | 3  | 3  | 3   | 0.681 | 1.701        | 1.037 |
| F1MS23     | Uncharacterized protein OS=Bos taurus GN=LCN1 PE=4 SV=2 - [F1MS23_BOVIN]          | 44.38 | 6  | 6  | 6   | 0.804 | 1.541        | 1.132 |
| E1BH06     | Uncharacterized protein OS=Bos taurus GN=LOC100852118 PE=1 SV=2 - [E1BH06_BOVIN]  | 13.79 | 11 | 22 | 24  | 0.578 | 2.098        | 1.137 |
| F1MNJ9     | Uncharacterized protein OS=Bos taurus GN=LOC535280 PE=4 SV=2 - [F1MNJ9_BOVIN]     | 7.95  | 2  | 2  | 2   | 1.124 | 4.075        | 1.515 |
| F1MCF1     | Uncharacterized protein OS=Bos taurus GN=LOC782688 PE=3 SV=1 - [F1MCF1_BOVIN]     | 6.69  | 2  | 2  | 2   | 2.181 | 2.910        | 1.062 |
| A0A0A0MPA0 | Uncharacterized protein OS=Bos taurus GN=LOC784932 PE=3 SV=1 - [A0A0A0MPA0_BOVIN] | 44.12 | 11 | 24 | 350 | 0.790 | 1.954        | 1.117 |
| F1MC59     | Uncharacterized protein OS=Bos taurus GN=LOC787241 PE=3 SV=1 - [F1MC59_BOVIN]     | 14.58 | 2  | 2  | 2   | 0.685 | 1.932        | 2.073 |
| E1BGJ0     | Uncharacterized protein OS=Bos taurus GN=LRP1 PE=4 SV=2 - [E1BGJ0_BOVIN]          | 2.02  | 6  | 6  | 6   | 0.841 | 1.977        | 1.049 |
| E1B933     | Uncharacterized protein OS=Bos taurus GN=LRRIQ1 PE=4 SV=2 - [E1B933_BOVIN]        | 1.44  | 2  | 2  | 2   | 0.920 | 3.282        | 1.052 |
| F1MVS9     | Uncharacterized protein OS=Bos taurus GN=MASP1 PE=3 SV=1 - [F1MVS9_BOVIN]         | 3.02  | 2  | 2  | 3   | 1.062 | 2.342        | 1.446 |
| F1MET4     | Uncharacterized protein OS=Bos taurus GN=MEGF10 PE=4 SV=2 - [F1MET4_BOVIN]        | 6.25  | 2  | 2  | 2   | 1.000 | 1.000        | 1.000 |
| G3MY87     | Uncharacterized protein OS=Bos taurus GN=MGAM PE=3 SV=1 - [G3MY87_BOVIN]          | 41.16 | 64 | 65 | 197 | 0.718 | <b>2.037</b> | 1.197 |
| F1MPD1     | Uncharacterized protein OS=Bos taurus GN=MRC2 PE=4 SV=1 - [F1MPD1_BOVIN]          | 1.18  | 2  | 2  | 3   | 0.800 | 2.149        | 1.205 |
| F1MQ37     | Uncharacterized protein OS=Bos taurus GN=MYH9 PE=1 SV=2 - [F1MQ37_BOVIN]          | 1.48  | 2  | 2  | 2   | 0.376 | 2.006        | 0.782 |
| E1BLM2     | Uncharacterized protein OS=Bos taurus GN=NRCAM PE=4 SV=2 - [E1BLM2_BOVIN]         | 3.06  | 3  | 3  | 3   | 0.793 | 2.016        | 1.222 |
| F1MGK8     | Uncharacterized protein OS=Bos taurus GN=OSMR PE=4 SV=2 - [F1MGK8_BOVIN]          | 14.43 | 4  | 11 | 18  | 0.847 | 2.399        | 1.233 |
| F6Q234     | Uncharacterized protein OS=Bos taurus GN=PEPD PE=3 SV=1 - [F6Q234_BOVIN]          | 33.67 | 15 | 15 | 19  | 0.818 | 2.371        | 1.253 |
| E1BH94     | Uncharacterized protein OS=Bos taurus GN=PGLYRP2 PE=4 SV=2 - [E1BH94_BOVIN]       | 12.59 | 5  | 5  | 5   | 0.756 | 2.811        | 1.242 |
| E1BF59     | Uncharacterized protein OS=Bos taurus GN=PLEC PE=1 SV=2 - [E1BF59_BOVIN]          | 0.30  | 2  | 2  | 2   | 0.504 | 1.913        | 0.864 |
| F1MFJ3     | Uncharacterized protein OS=Bos taurus GN=PTPRG PE=4 SV=2 - [F1MFJ3_BOVIN]         | 4.12  | 5  | 5  | 5   | 0.820 | 2.019        | 1.088 |
| F1MGK5     | Uncharacterized protein OS=Bos taurus GN=PTPRZ1 PE=4 SV=2 - [F1MGK5_BOVIN]        | 0.69  | 2  | 2  | 2   | 0.414 | 1.811        | 1.811 |

|            |                                                                                    |       |    |    |     |              |              |              |
|------------|------------------------------------------------------------------------------------|-------|----|----|-----|--------------|--------------|--------------|
| G3N2L2     | Uncharacterized protein OS=Bos taurus GN=RCN1 PE=4 SV=1 - [G3N2L2_BOVIN]           | 9.35  | 2  | 2  | 2   | 0.128        | 2.764        | 1.395        |
| E1BNR9     | Uncharacterized protein OS=Bos taurus GN=SEMA7A PE=4 SV=1 - [E1BNR9_BOVIN]         | 8.71  | 5  | 5  | 6   | 0.711        | 2.553        | 1.137        |
| E1BMJ0     | Uncharacterized protein OS=Bos taurus GN=SERPING1 PE=3 SV=2 - [E1BMJ0_BOVIN]       | 6.84  | 3  | 3  | 3   | 0.628        | 2.987        | 1.153        |
| G3MWJ1     | Uncharacterized protein OS=Bos taurus GN=SFR1 PE=4 SV=1 - [G3MWJ1_BOVIN]           | 16.46 | 2  | 2  | 2   | 0.674        | 2.126        | 1.169        |
| F1N2B5     | Uncharacterized protein OS=Bos taurus GN=SLC3A2 PE=4 SV=2 - [F1N2B5_BOVIN]         | 6.73  | 3  | 3  | 4   | 0.697        | 2.095        | 1.181        |
| F1MF78     | Uncharacterized protein OS=Bos taurus GN=SYNE2 PE=4 SV=2 - [F1MF78_BOVIN]          | 0.48  | 3  | 3  | 3   | <b>3.953</b> | <b>2.355</b> | 1.068        |
| E1BIG6     | Uncharacterized protein OS=Bos taurus GN=TFRC PE=4 SV=2 - [E1BIG6_BOVIN]           | 9.36  | 8  | 8  | 8   | 0.732        | 2.043        | 1.290        |
| E1BKJ5     | Uncharacterized protein OS=Bos taurus GN=TRRAP PE=3 SV=2 - [E1BKJ5_BOVIN]          | 0.57  | 2  | 2  | 2   | 0.803        | 1.826        | 1.324        |
| Q9GKR3     | Uncharacterized protein OS=Bos taurus GN=VCAM1 PE=2 SV=1 - [Q9GKR3_BOVIN]          | 9.88  | 6  | 6  | 6   | 0.830        | 2.014        | 1.490        |
| F1N789     | Uncharacterized protein OS=Bos taurus GN=VCL PE=1 SV=1 - [F1N789_BOVIN]            | 2.91  | 4  | 4  | 4   | 0.973        | 2.412        | 1.051        |
| Q3ZBS7     | Uncharacterized protein OS=Bos taurus GN=VTN PE=2 SV=1 - [Q3ZBS7_BOVIN]            | 12.61 | 4  | 4  | 5   | 0.856        | 3.206        | 1.272        |
| E1B735     | Uncharacterized protein OS=Bos taurus GN=XPNPEP2 PE=3 SV=1 - [E1B735_BOVIN]        | 6.54  | 3  | 3  | 3   | 0.726        | 2.169        | 1.152        |
| G3N0V0     | Uncharacterized protein OS=Bos taurus PE=1 SV=1 - [G3N0V0_BOVIN]                   | 38.34 | 12 | 12 | 29  | 0.697        | 2.180        | 1.158        |
| G5E513     | Uncharacterized protein OS=Bos taurus PE=1 SV=1 - [G5E513_BOVIN]                   | 52.95 | 9  | 16 | 70  | 0.682        | 2.133        | 1.229        |
| G5E5T5     | Uncharacterized protein OS=Bos taurus PE=1 SV=1 - [G5E5T5_BOVIN]                   | 57.07 | 6  | 13 | 60  | 0.726        | <b>2.246</b> | 1.150        |
| G5E604     | Uncharacterized protein OS=Bos taurus PE=1 SV=1 - [G5E604_BOVIN]                   | 58.88 | 3  | 5  | 18  | 0.629        | 1.181        | 1.000        |
| F1MD73     | Uncharacterized protein OS=Bos taurus PE=1 SV=2 - [F1MD73_BOVIN]                   | 9.82  | 4  | 4  | 5   | 0.822        | 1.894        | 1.120        |
| F1MH40     | Uncharacterized protein OS=Bos taurus PE=1 SV=2 - [F1MH40_BOVIN]                   | 54.17 | 3  | 11 | 27  | 0.836        | 1.740        | 1.003        |
| A0A0N4STN1 | Uncharacterized protein OS=Bos taurus PE=3 SV=1 - [A0A0N4STN1_BOVIN]               | 18.06 | 2  | 2  | 3   | 0.826        | 1.509        | 1.040        |
| F1N614     | Uncharacterized protein OS=Bos taurus PE=3 SV=2 - [F1N614_BOVIN]                   | 4.67  | 3  | 3  | 3   | 0.609        | 3.590        | 1.164        |
| G3MXG6     | Uncharacterized protein OS=Bos taurus PE=4 SV=1 - [G3MXG6_BOVIN]                   | 34.53 | 2  | 2  | 3   | 0.750        | 2.781        | 1.312        |
| G3N1H5     | Uncharacterized protein OS=Bos taurus PE=4 SV=1 - [G3N1H5_BOVIN]                   | 32.58 | 2  | 2  | 3   | 0.666        | 2.802        | 1.085        |
| G3X7I5     | Uncharacterized protein OS=Bos taurus PE=4 SV=1 - [G3X7I5_BOVIN]                   | 37.61 | 2  | 2  | 2   | 0.466        | 2.040        | 1.206        |
| G8JL04     | Uncharacterized protein OS=Bos taurus PE=4 SV=1 - [G8JL04_BOVIN]                   | 70.00 | 4  | 4  | 6   | 1.023        | 1.752        | 1.071        |
| E1B9K1     | Uncharacterized protein OS=Bos taurus PE=4 SV=2 - [E1B9K1_BOVIN]                   | 32.79 | 2  | 2  | 3   | 0.920        | 1.498        | 0.930        |
| F1MJK3     | Uncharacterized protein OS=Bos taurus PE=4 SV=2 - [F1MJK3_BOVIN]                   | 31.49 | 43 | 43 | 88  | 0.815        | <b>3.338</b> | <b>2.175</b> |
| F1MLW8     | Uncharacterized protein OS=Bos taurus PE=4 SV=2 - [F1MLW8_BOVIN]                   | 32.62 | 4  | 8  | 20  | 0.711        | 1.727        | 1.173        |
| F1MPF3     | Uncharacterized protein OS=Bos taurus PE=4 SV=2 - [F1MPF3_BOVIN]                   | 1.68  | 2  | 2  | 2   | 0.802        | 2.107        | 1.074        |
| F1N3L5     | Uncharacterized protein OS=Bos taurus PE=4 SV=2 - [F1N3L5_BOVIN]                   | 6.35  | 5  | 5  | 5   | 0.887        | 2.490        | 1.434        |
| F1N757     | Uncharacterized protein OS=Bos taurus PE=4 SV=2 - [F1N757_BOVIN]                   | 0.09  | 2  | 3  | 4   | 1.856        | 2.095        | 1.060        |
| P48616     | Vimentin OS=Bos taurus GN=VIM PE=1 SV=3 - [VIME_BOVIN]                             | 12.66 | 5  | 6  | 7   | <b>4.065</b> | <b>6.724</b> | <b>2.217</b> |
| F1N5M2     | Vitamin D-binding protein OS=Bos taurus GN=GC PE=1 SV=2 - [F1N5M2_BOVIN]           | 76.79 | 2  | 44 | 362 | 0.625        | <b>2.112</b> | 1.221        |
| Q3MHN5     | Vitamin D-binding protein OS=Bos taurus GN=GC PE=2 SV=1 - [VTDB_BOVIN]             | 74.68 | 2  | 44 | 349 | 0.662        | <b>2.167</b> | 1.181        |
| A0A140T851 | Vitamin K-dependent protein C OS=Bos taurus GN=PROC PE=3 SV=1 - [A0A140T851_BOVIN] | 16.46 | 6  | 6  | 6   | 0.810        | 3.002        | 1.615        |
| P07224     | Vitamin K-dependent protein S OS=Bos taurus GN=PROS1 PE=1 SV=1 - [PROS_BOVIN]      | 5.19  | 3  | 3  | 3   | 0.903        | 2.032        | 1.456        |
| Q3ZCH5     | Zinc-alpha-2-glycoprotein OS=Bos taurus GN=AZGP1 PE=2 SV=1 - [ZA2G_BOVIN]          | 41.14 | 13 | 13 | 43  | 0.831        | 1.820        | 1.094        |

Supplementary Table 4. Details of specific peptides from proteins detected at a higher level across all OP9-conditioned media.

|                               |                                           | Primary media | Secondary media | Tertiary media |
|-------------------------------|-------------------------------------------|---------------|-----------------|----------------|
|                               |                                           | OP9/Ctrl      | OP9/Ctrl        | OP9/Ctrl       |
| NPC2                          | <b>Mouse specific peptides</b>            |               |                 |                |
|                               | eVNVSPcPTDPcQLHk                          | 42.685        | 71.498          | 75.623         |
|                               | <b>Other peptides</b>                     |               |                 |                |
|                               | sGINcPIQk (common to human + mouse)       | 37.37         | 50.847          | 26.613         |
|                               | nEYPSIk (common to bovine + mouse)        | 9.744         | 38.75           | 12.274         |
| Follistatin-related protein 1 | <b>Mouse specific peptides</b>            |               |                 |                |
|                               | hQGTAek                                   | 56.706        | 23.915          | 17.235         |
|                               | <b>Peptide common to Bovine and human</b> |               |                 |                |
|                               | hQETAek                                   | 0.659         | 2.027           | 1.087          |
| Angiotensinogen               | <b>Mouse specific peptides</b>            |               |                 |                |
|                               | gSYNLQDLLAEDk                             | 4.403         | 4.857           | 0.775          |
|                               | nDLLTWIENPPPR                             | 9.793         | 11.965          | 9.243          |
|                               | sLDLSTDPVLATEk                            | 28.323        | 80.424          | 74.108         |
|                               |                                           | 17.409        | 100             | 52.825         |
|                               | sTcAQLENPSVETLPESTFEPVPIQAK               | 8.316         | 35.057          | 10.642         |
|                               | tLHDQLVLAAEK                              | 1.753         | 3.542           | 2.635          |
|                               | <b>Median ration from PD</b>              | <b>9.024</b>  | <b>20.481</b>   | <b>9.918</b>   |
|                               | <b>Bovine specific peptides</b>           |               |                 |                |
|                               | IQAFLGVPGEQGcTSR                          | 1.086         | 2.312           | 1.805          |
|                               | sLDLSTDPNLAAEK                            | 1.176         | 2.441           | 3.066          |
|                               | sSAVDEEALWEQLVR                           | 1.056         | 1.657           | 2.906          |
|                               | 0.643                                     | 1.271         | 2.304           |                |
| <b>Median ration from PD</b>  | <b>1.071</b>                              | <b>1.958</b>  | <b>2.588</b>    |                |
| SPARC                         | <b>Mouse specific peptides</b>            |               |                 |                |
|                               | yIAPcLDSELTEFPLR                          | 35.333        | 83.561          | 56.506         |
|                               |                                           | 100           | 100             | 100            |
|                               |                                           | 5.512         | 13.598          | 6.605          |
|                               | yIALEEWAGcFGIk                            | 31.49         | 68.651          | 29.777         |
|                               |                                           | 100           | 97.675          | 58.393         |
|                               | dEGNNLLTEk                                | 90.271        | 100             | 24.388         |
|                               |                                           | 2.768         | 3.483           | 3.228          |
|                               | <b>Median</b>                             | <b>35.333</b> | <b>83.561</b>   | <b>29.777</b>  |
|                               | <b>Bovine specific peptides</b>           |               |                 |                |
|                               | yIPPCLDSELTEFPLR                          | 0.788         | 1.74            | 0.879          |
|                               |                                           | 0.576         | 1.82            | 0.961          |
| yIALDEWAGcFGIk                | 0.576                                     | 1.904         | 1.038           |                |
| dEDNNLLTEk                    | 0.55                                      | 1.639         | 1.101           |                |
| <b>Median</b>                 | <b>0.576</b>                              | <b>1.78</b>   | <b>0.9995</b>   |                |
| Collagen alpha-2(I) chain     | <b>Mouse specific peptides</b>            |               |                 |                |
|                               | gEAGAAGPSGPAGPR                           | 3.94          | 3.627           | 2.185          |
|                               | gPAGPSGPVgk                               | 7.643         | 11.824          | 5.595          |
|                               | <b>Median ration from PD</b>              | <b>5.488</b>  | <b>6.549</b>    | <b>3.497</b>   |
|                               | <b>Bovine specific peptides</b>           |               |                 |                |
|                               | aGVmGPAGSR                                | 4.735         | 6.114           | 0.884          |
| <b>Median</b>                 | <b>4.735</b>                              | <b>6.114</b>  | <b>0.884</b>    |                |
| Dickkopf-related protein 3    | <b>Mouse specific peptides</b>            |               |                 |                |
|                               | eVEELMEDTQHk*                             | 20.128        | 55.852          | 12.038         |
|                               | sHEclIDEDcGPTR                            | 21.807        | 29.315          | 21.418         |
|                               | ycQFSSFk                                  | 0.993         | 3.309           | 2.396          |
|                               | <b>Median</b>                             | <b>20.128</b> | <b>29.315</b>   | <b>12.038</b>  |
|                               | <b>Bovine specific peptides</b>           |               |                 |                |
|                               | dQQTLcTR                                  | 1.12          | 1.073           | 1.008          |
|                               | eVEELMEDTQYk                              | 0.889         | 1.347           | 1.264          |
| gLLFPVcTLPVVEGELcHDPASR       | 0.967                                     | 1.422         | 1.033           |                |
| <b>Median ration from PD</b>  | <b>0.967</b>                              | <b>1.347</b>  | <b>1.033</b>    |                |



| * Same sequence as human but not detected from human database search |                                 |              |              |               |
|----------------------------------------------------------------------|---------------------------------|--------------|--------------|---------------|
| Cathepsin B                                                          | <b>Mouse specific peptides</b>  |              |              |               |
|                                                                      | eQWSNcPTIGQIR                   | 3.342        | 5.568        | 5.194         |
|                                                                      | gENHcGIESEIVAGIPR               | 1.029        | 3.332        | 1.369         |
|                                                                      | hEAGDMMGGHAIR                   | 4.024        | 7.731        | 5.051         |
|                                                                      | kLcGTVLGGPk                     | 2.668        | 7.152        | 3.715         |
|                                                                      |                                 | 17.442       | 55.503       | 19.208        |
|                                                                      | lCgTVLGGPk                      | 6.899        | 31.381       | 27.531        |
|                                                                      | scEAGYSPSYk                     | 24.273       | 40.836       | 23.133        |
|                                                                      | scEAGYSPSYKEDk                  | 2.568        | 7.402        | 3.555         |
|                                                                      | vAFGEDIDLPEFDAR                 | 4.394        | 8.042        | 5.581         |
|                                                                      | <b>Median</b>                   | <b>4.024</b> | <b>7.731</b> | <b>5.194</b>  |
|                                                                      | <b>Bovine specific peptides</b> |              |              |               |
|                                                                      | dAFAADVLPESFDAR                 | 0.637        | 2.279        | 1.137         |
|                                                                      | eQWPNcPTIk                      | 0.899        | 1.618        | 1.218         |
|                                                                      |                                 | 0.82         | 1.71         | 1.381         |
|                                                                      | lCgAILGGPk                      | 0.693        | 1.569        | 1.109         |
|                                                                      |                                 | 0.657        | 0.53         | 1.322         |
|                                                                      | tcEPGYSPSYkEDk                  | 0.711        | 1.811        | 1.041         |
|                                                                      | <b>Median</b>                   | <b>0.702</b> | <b>1.664</b> | <b>1.1775</b> |
| Cathepsin Z                                                          | <b>Mouse specific peptides</b>  |              |              |               |
|                                                                      | gDQLALLGR                       | 18.504       | 16.291       | 13.363        |
|                                                                      | nSWGEPWGEK                      | 3.03         | 5.932        | 2.294         |
|                                                                      | sGQTcYHPIR                      | 4.946        | 8.107        | 4.468         |
|                                                                      | <b>Median</b>                   | <b>4.946</b> | <b>8.107</b> | <b>4.468</b>  |
|                                                                      | <b>Human specific peptide</b>   |              |              |               |
| nVDGVNYASITR                                                         | 0.178                           | 2.072        | 1.58         |               |
| Adiponectin                                                          | Mouse specific peptides         |              |              |               |
|                                                                      | aVLFTYDQYQEk                    | 4.724        | 5.699        | 1.64          |
|                                                                      |                                 | 3.759        | 15.627       | 27.155        |
|                                                                      | gETGDVGMTGAEGPR                 | 0.941        | 2.825        | 1.792         |
|                                                                      | iFYNQQNHYDGSTGk                 | 1.538        | 8.868        | 2.305         |
|                                                                      |                                 | 3.92         | 23.092       | 12.84         |
|                                                                      |                                 | 1.716        | 26.664       | 6.075         |
|                                                                      | sAFSVGLETR                      | 2.02         | 16.463       | 2.559         |
|                                                                      | vTVPNVPIR                       | 8.497        | 35.074       | 22.097        |
|                                                                      | <b>Median ratio from PD</b>     | <b>2.756</b> | <b>16.04</b> | <b>3.943</b>  |
|                                                                      | <b>Bovine specific peptides</b> |              |              |               |
|                                                                      | aLLFTHDQFQDk                    | 0.582        | 1.738        | 1.345         |
|                                                                      |                                 | 0.523        | 1.74         | 1.266         |
|                                                                      |                                 | 0.748        | 2.077        | 1.559         |
|                                                                      | iFYNQQNHYDGTGk                  | 0.942        | 2.37         | 1.924         |
|                                                                      |                                 | 0.727        | 2.372        | 1.17          |
|                                                                      |                                 | 0.795        | 2.221        | 1.342         |
|                                                                      | nVDQASGSVLLYLEk                 | 0.701        | 2.064        | 1.292         |
|                                                                      |                                 | 0.719        | 2.195        | 1.139         |
| qVTPNVPIR                                                            | 0.661                           | 3.466        | 1.299        |               |
|                                                                      | 0.652                           | 1.185        | 1.514        |               |
| sAFSVGLER                                                            | 0.684                           | 2.419        | 0.893        |               |
| <b>Median ratio from PD</b>                                          | <b>0.701</b>                    | <b>2.195</b> | <b>1.299</b> |               |
| Collagen alpha-1(I) chain                                            | <b>Mouse specific peptides</b>  |              |              |               |
|                                                                      | sAGVSVPGPMGPPSGPR               | 4.188        | 14.192       | 4.288         |
|                                                                      | <b>Bovine specific peptides</b> |              |              |               |
|                                                                      | dcPNAk                          | 0.625        | 1.702        | 0.983         |
|                                                                      | gEAGPSGPAGPTGAR                 | 4.988        | 1.416        | 1.67          |
|                                                                      | gEGGPQGPR                       | 16.403       | 1.32         | 1.646         |
|                                                                      | gETGPAGPAGPIGPVGAR              | 13.483       | 1.15         | 1             |
|                                                                      |                                 | 0.87         | 1.56         | 0.973         |
|                                                                      |                                 | 0.711        | 1.706        | 0.991         |
|                                                                      |                                 | 0.827        | 1.896        | 0.971         |
| vPTNEcRPVcPFGQESPTDQETTGVFEGPk                                       | 0.912                           | 1.745        | 1.55         |               |

|                                       |                                            |               |               |              |
|---------------------------------------|--------------------------------------------|---------------|---------------|--------------|
|                                       | VFTDECCFVCFEGQESFTDQETTGVEGFR              | 1.146         | 2.019         | 0.981        |
|                                       |                                            | 0.849         | 1.742         | 1.022        |
|                                       |                                            | 0.685         | 1.87          | 1.198        |
|                                       |                                            | 0.776         | 1.725         | 1.587        |
|                                       | <b>Median</b>                              | <b>0.8595</b> | <b>1.7155</b> | <b>1.011</b> |
|                                       |                                            |               |               |              |
| <b>Complement factor D</b>            | <b>Mouse specific peptides</b>             |               |               |              |
|                                       | gDSGSPLVcGDAVEGVVTWGSR                     | 4.169         | 12.667        | 7.427        |
|                                       | rPDVLHQLR                                  | 2.481         | 9.552         | 8            |
|                                       | tYHDGVVTINMMcAESNR                         | 1.002         | 12.126        | 2.915        |
|                                       | <b>Median ratio from PD</b>                | <b>2.481</b>  | <b>12.126</b> | <b>7.427</b> |
|                                       | <b>Not found in bovine or human</b>        |               |               |              |
|                                       |                                            |               |               |              |
| <b>Superoxide dismutase 3 [Cu-Zn]</b> | <b>Mouse specific peptides</b>             |               |               |              |
|                                       | eVDAAEMHAIcR                               | 7.041         | 11.349        | 12.49        |
|                                       | IAccVVGTSSSAAWESQTK                        | 0.778         | 3.733         | 2.644        |
|                                       | <b>Median from PD</b>                      | <b>2.34</b>   | <b>6.509</b>  | <b>5.747</b> |
|                                       | <b>Not found in bovine or human</b>        |               |               |              |
|                                       |                                            |               |               |              |
| <b>IGFBP4</b>                         | <b>Mouse specific peptides</b>             |               |               |              |
|                                       | tHEDLFIIPNcDR                              | 3.495         | 23.844        | 8.206        |
|                                       | <b>Peptide common to all three species</b> |               |               |              |
|                                       | qcHPALDGQR                                 | 1.264         | 6.314         | 1.331        |
|                                       |                                            |               |               |              |
| <b>Carbonic anhydrase 3</b>           | <b>Mouse specific peptides</b>             |               |               |              |
|                                       | gGPLSGPYR                                  | 1.356         | 3.517         | 1.917        |
